# Supplementary figures and images for: Myelin repair is fostered by the corticosteroid medrysone specifically acting on astroglial subpopulations
Source: PubMed Central journal article supplement — eBioMedicine. 2022 Aug 8;83:104204. doi: 10.1016/j.ebiom.2022.104204 (PMC9385547; doi:10.1016/j.ebiom.2022.104204), 2022-08-08

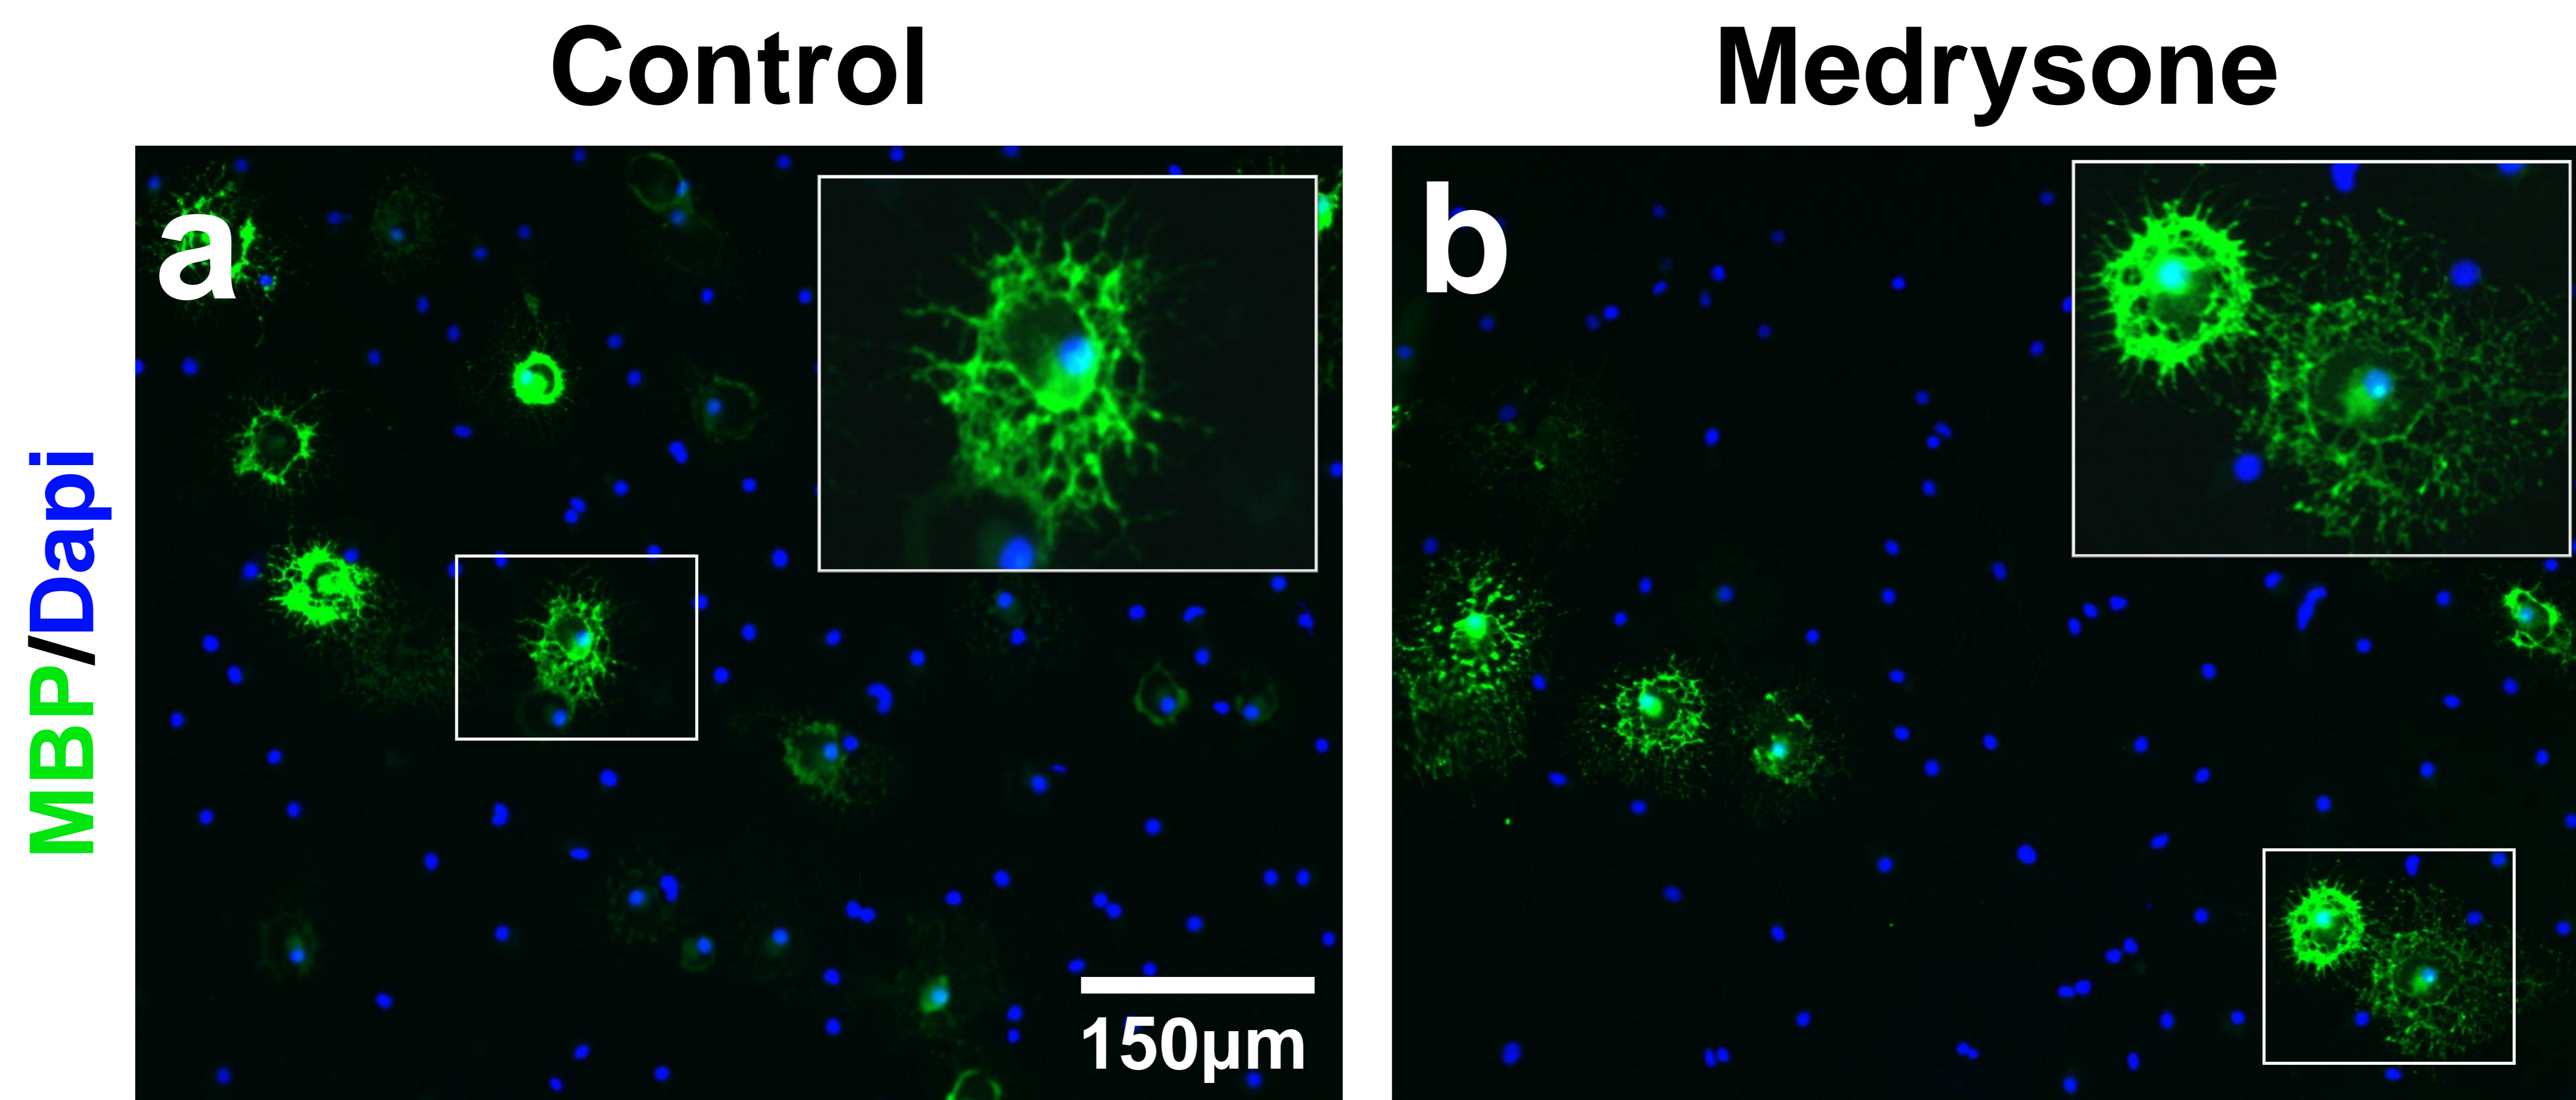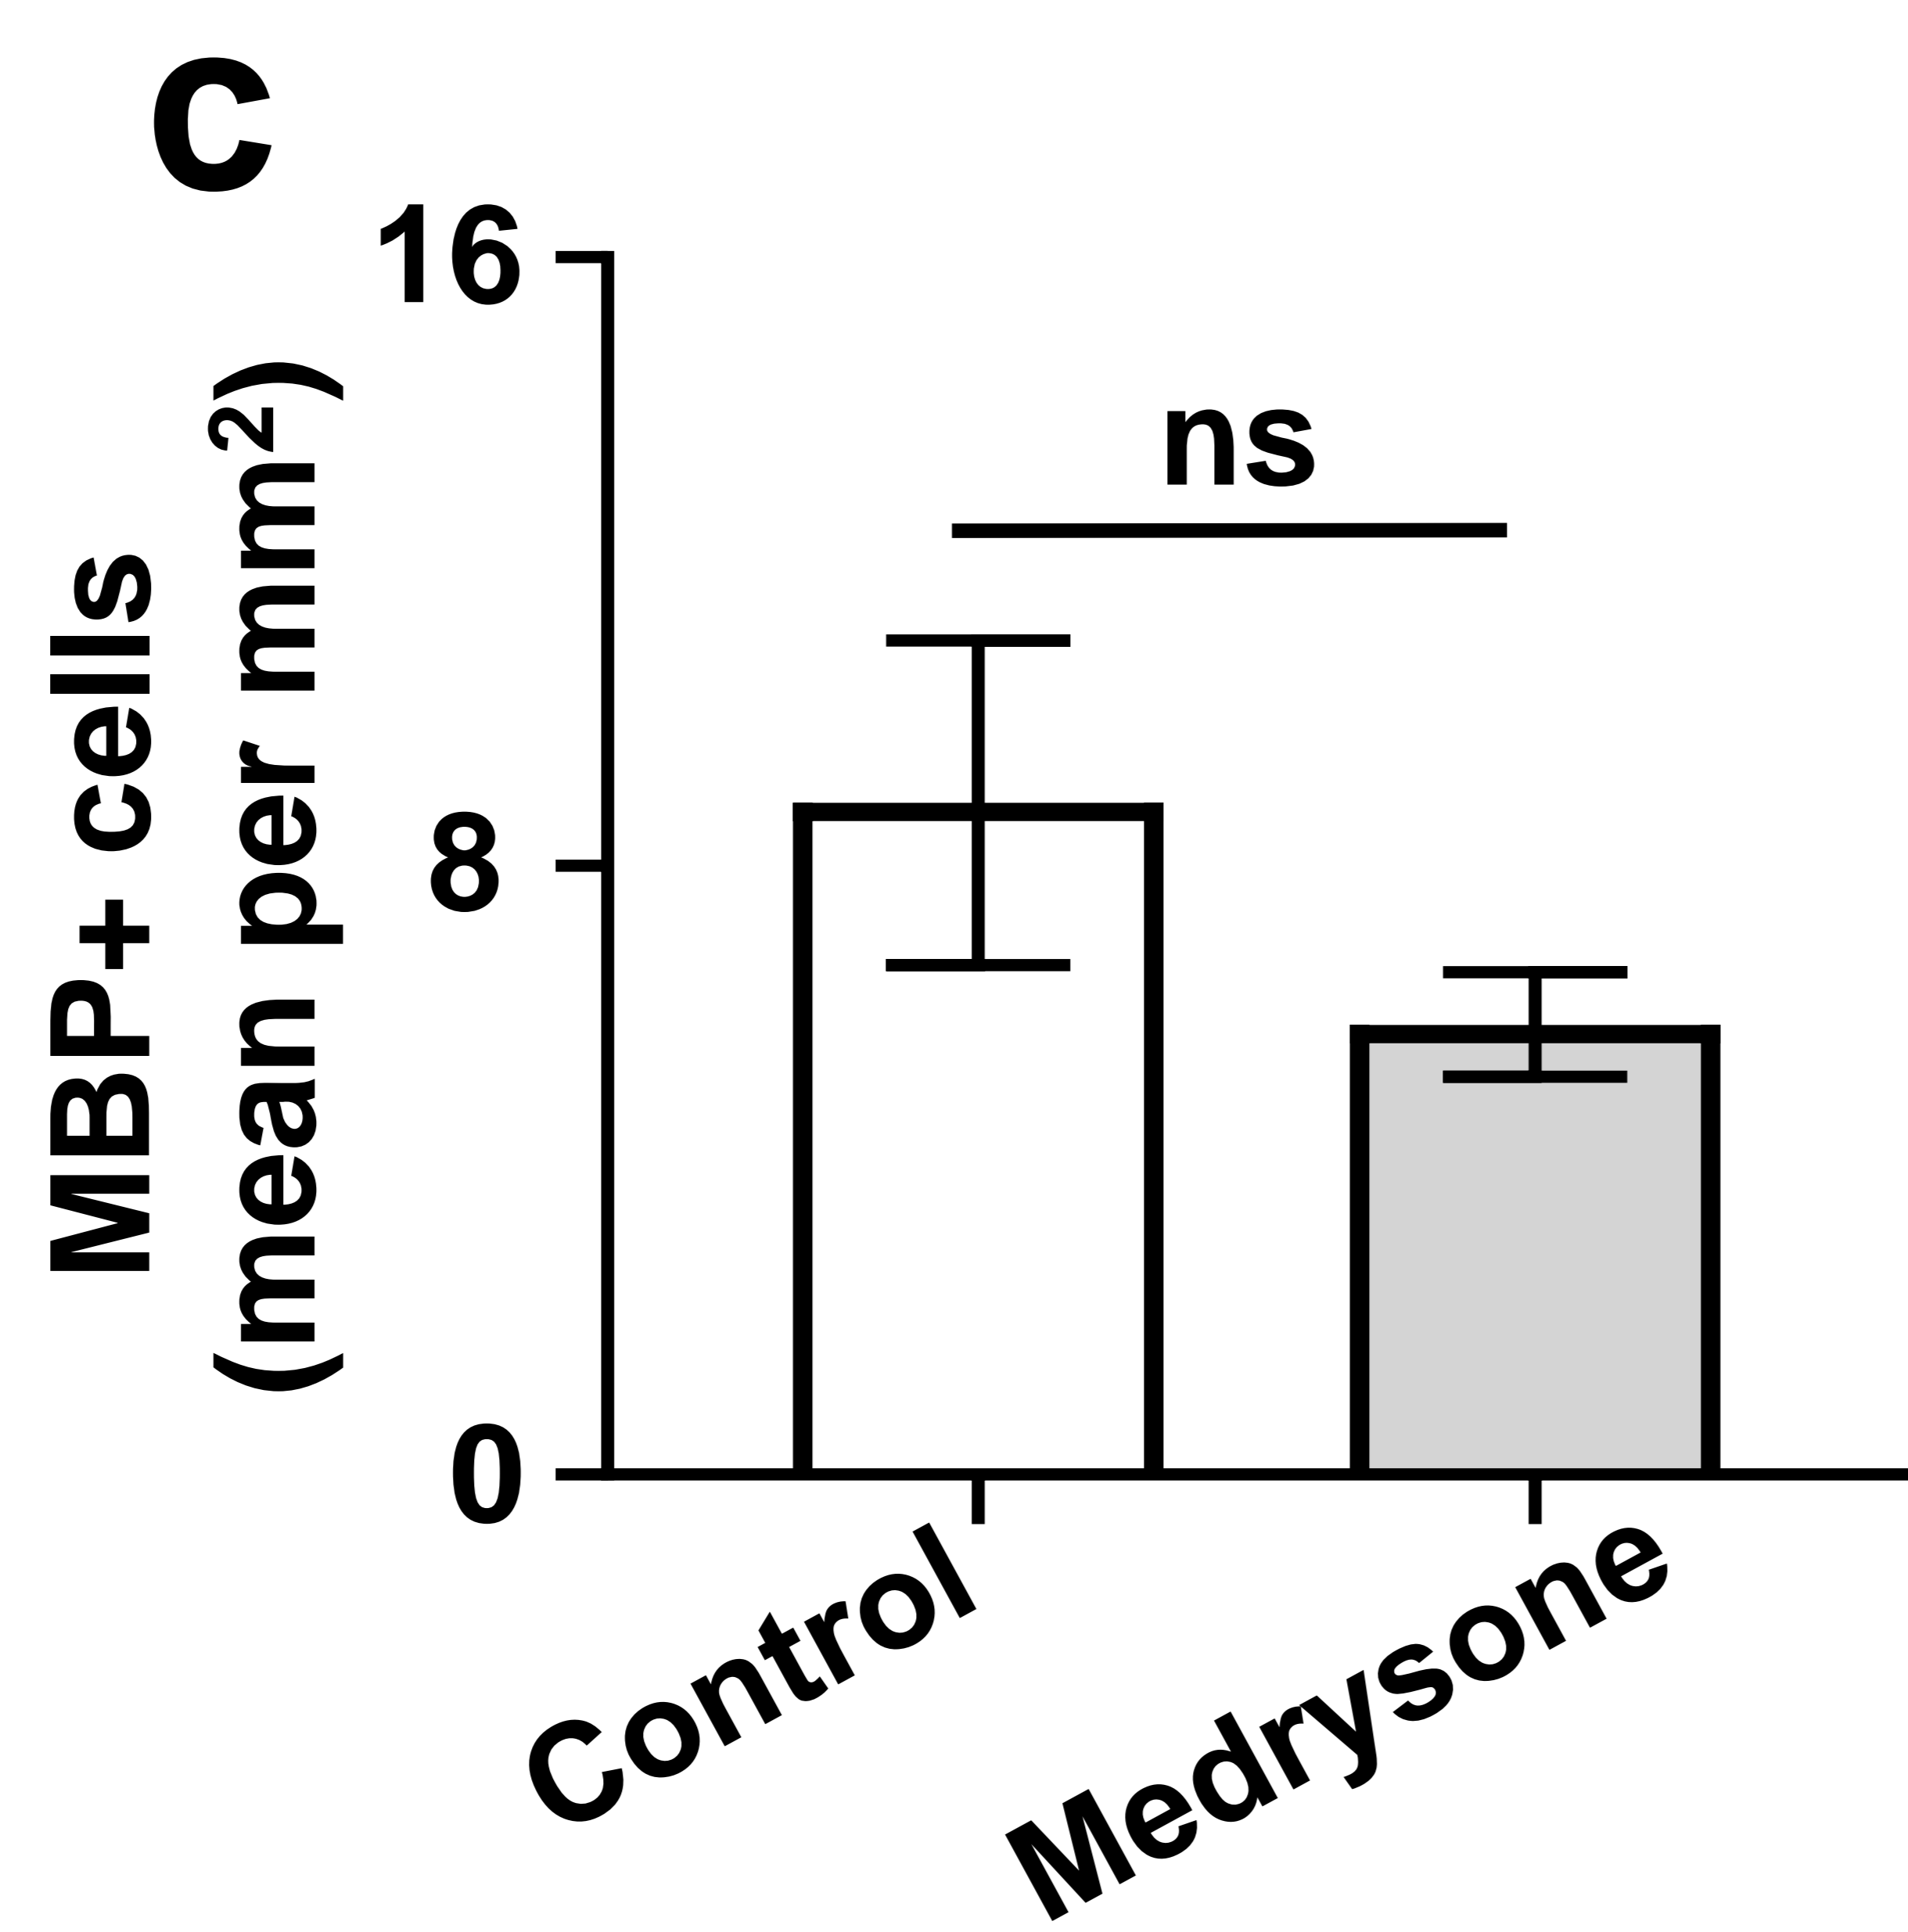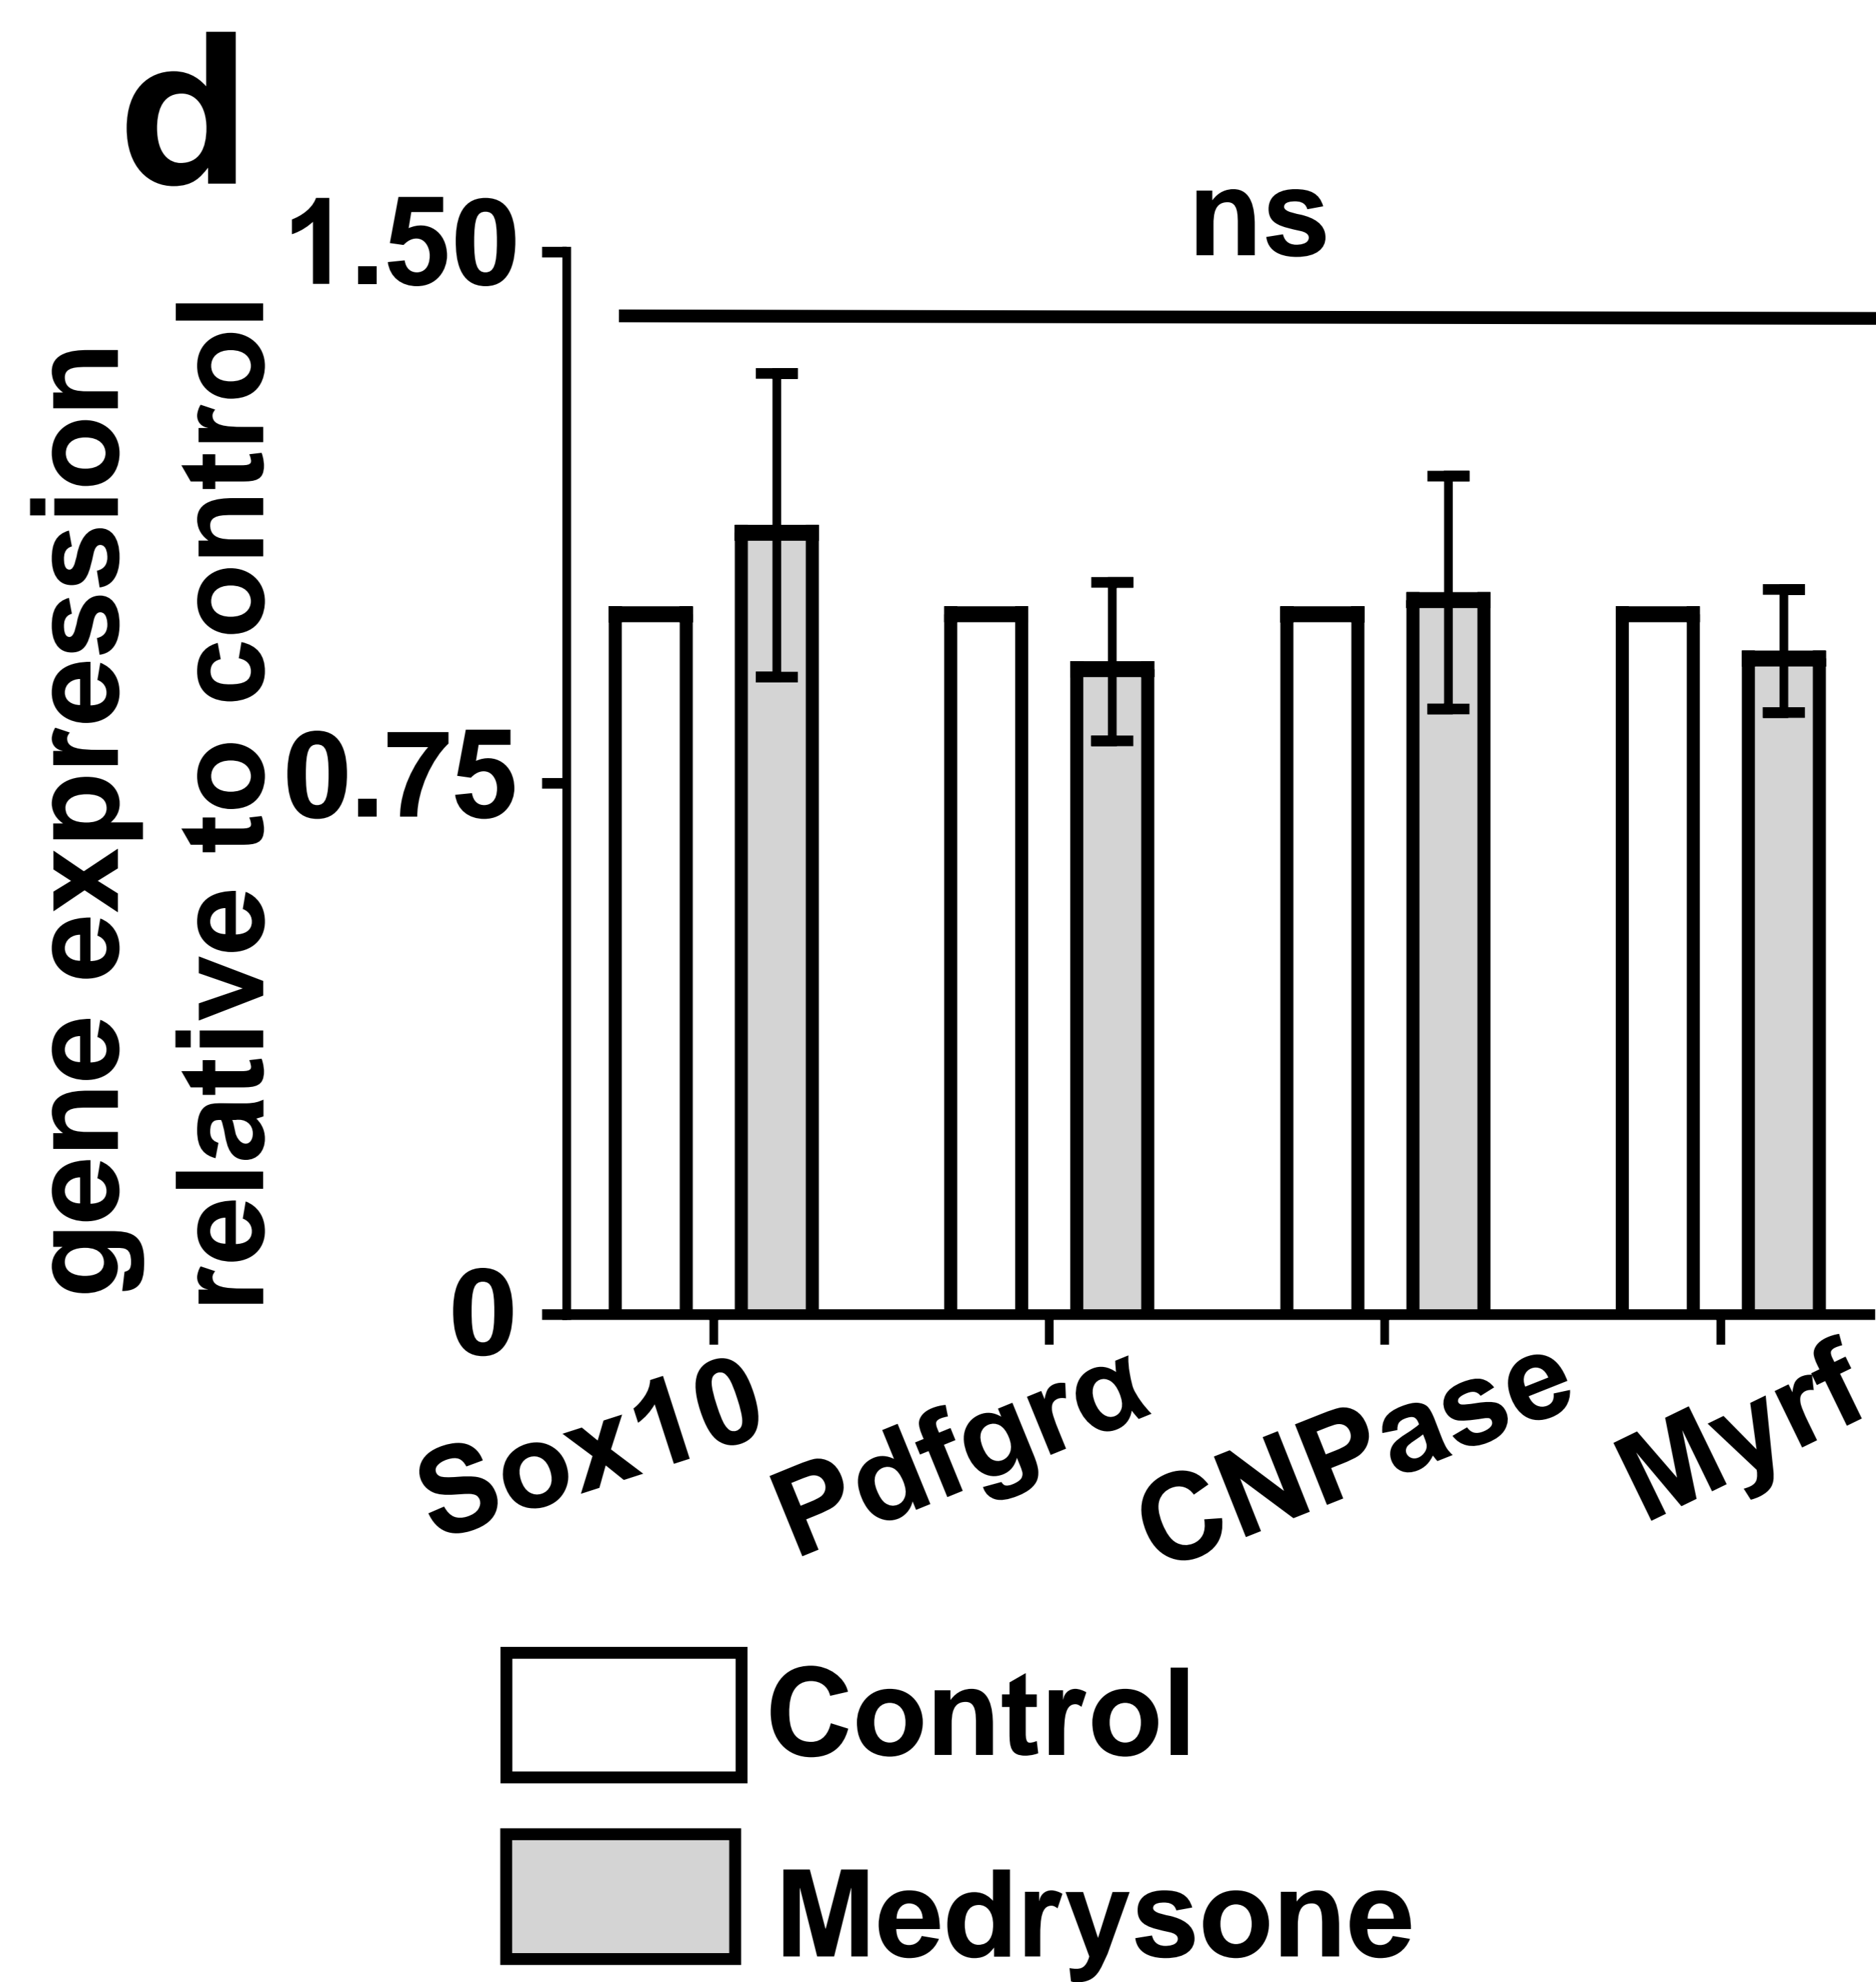

Supplement: mmc2.pdf [file mmc2.pdf]

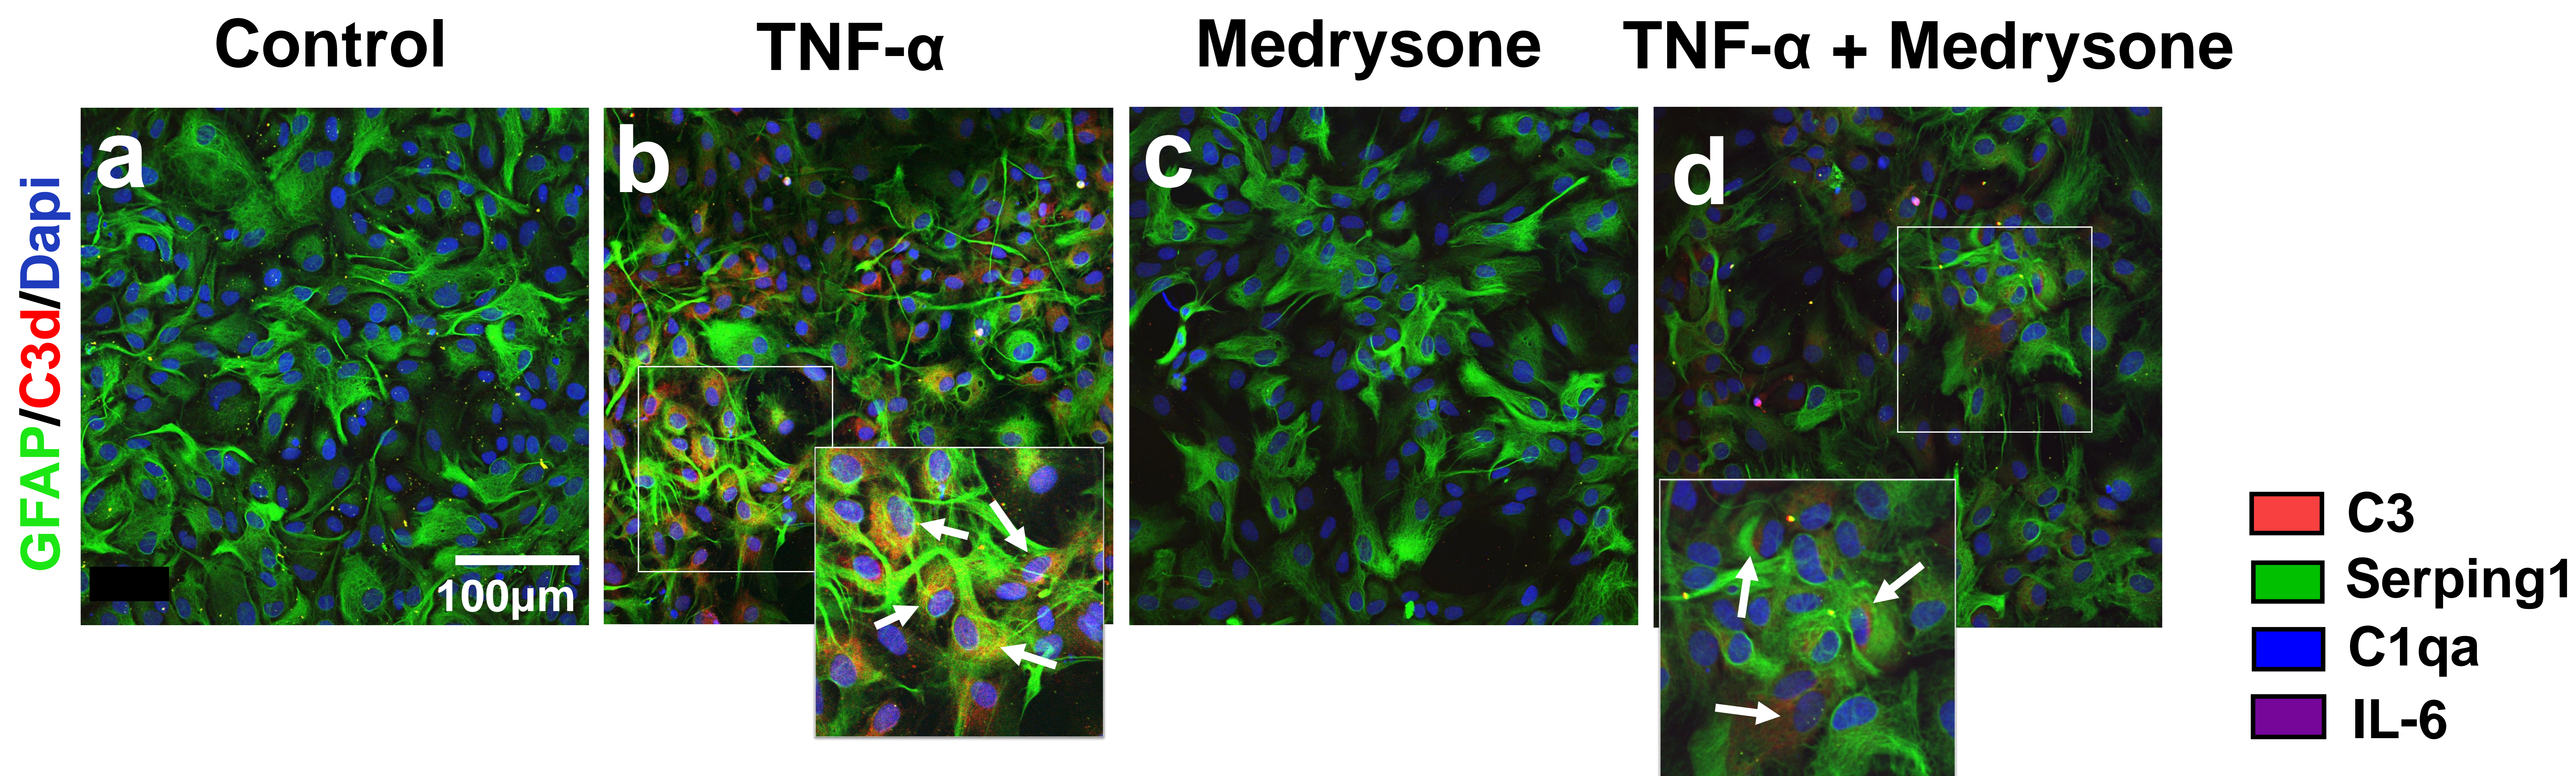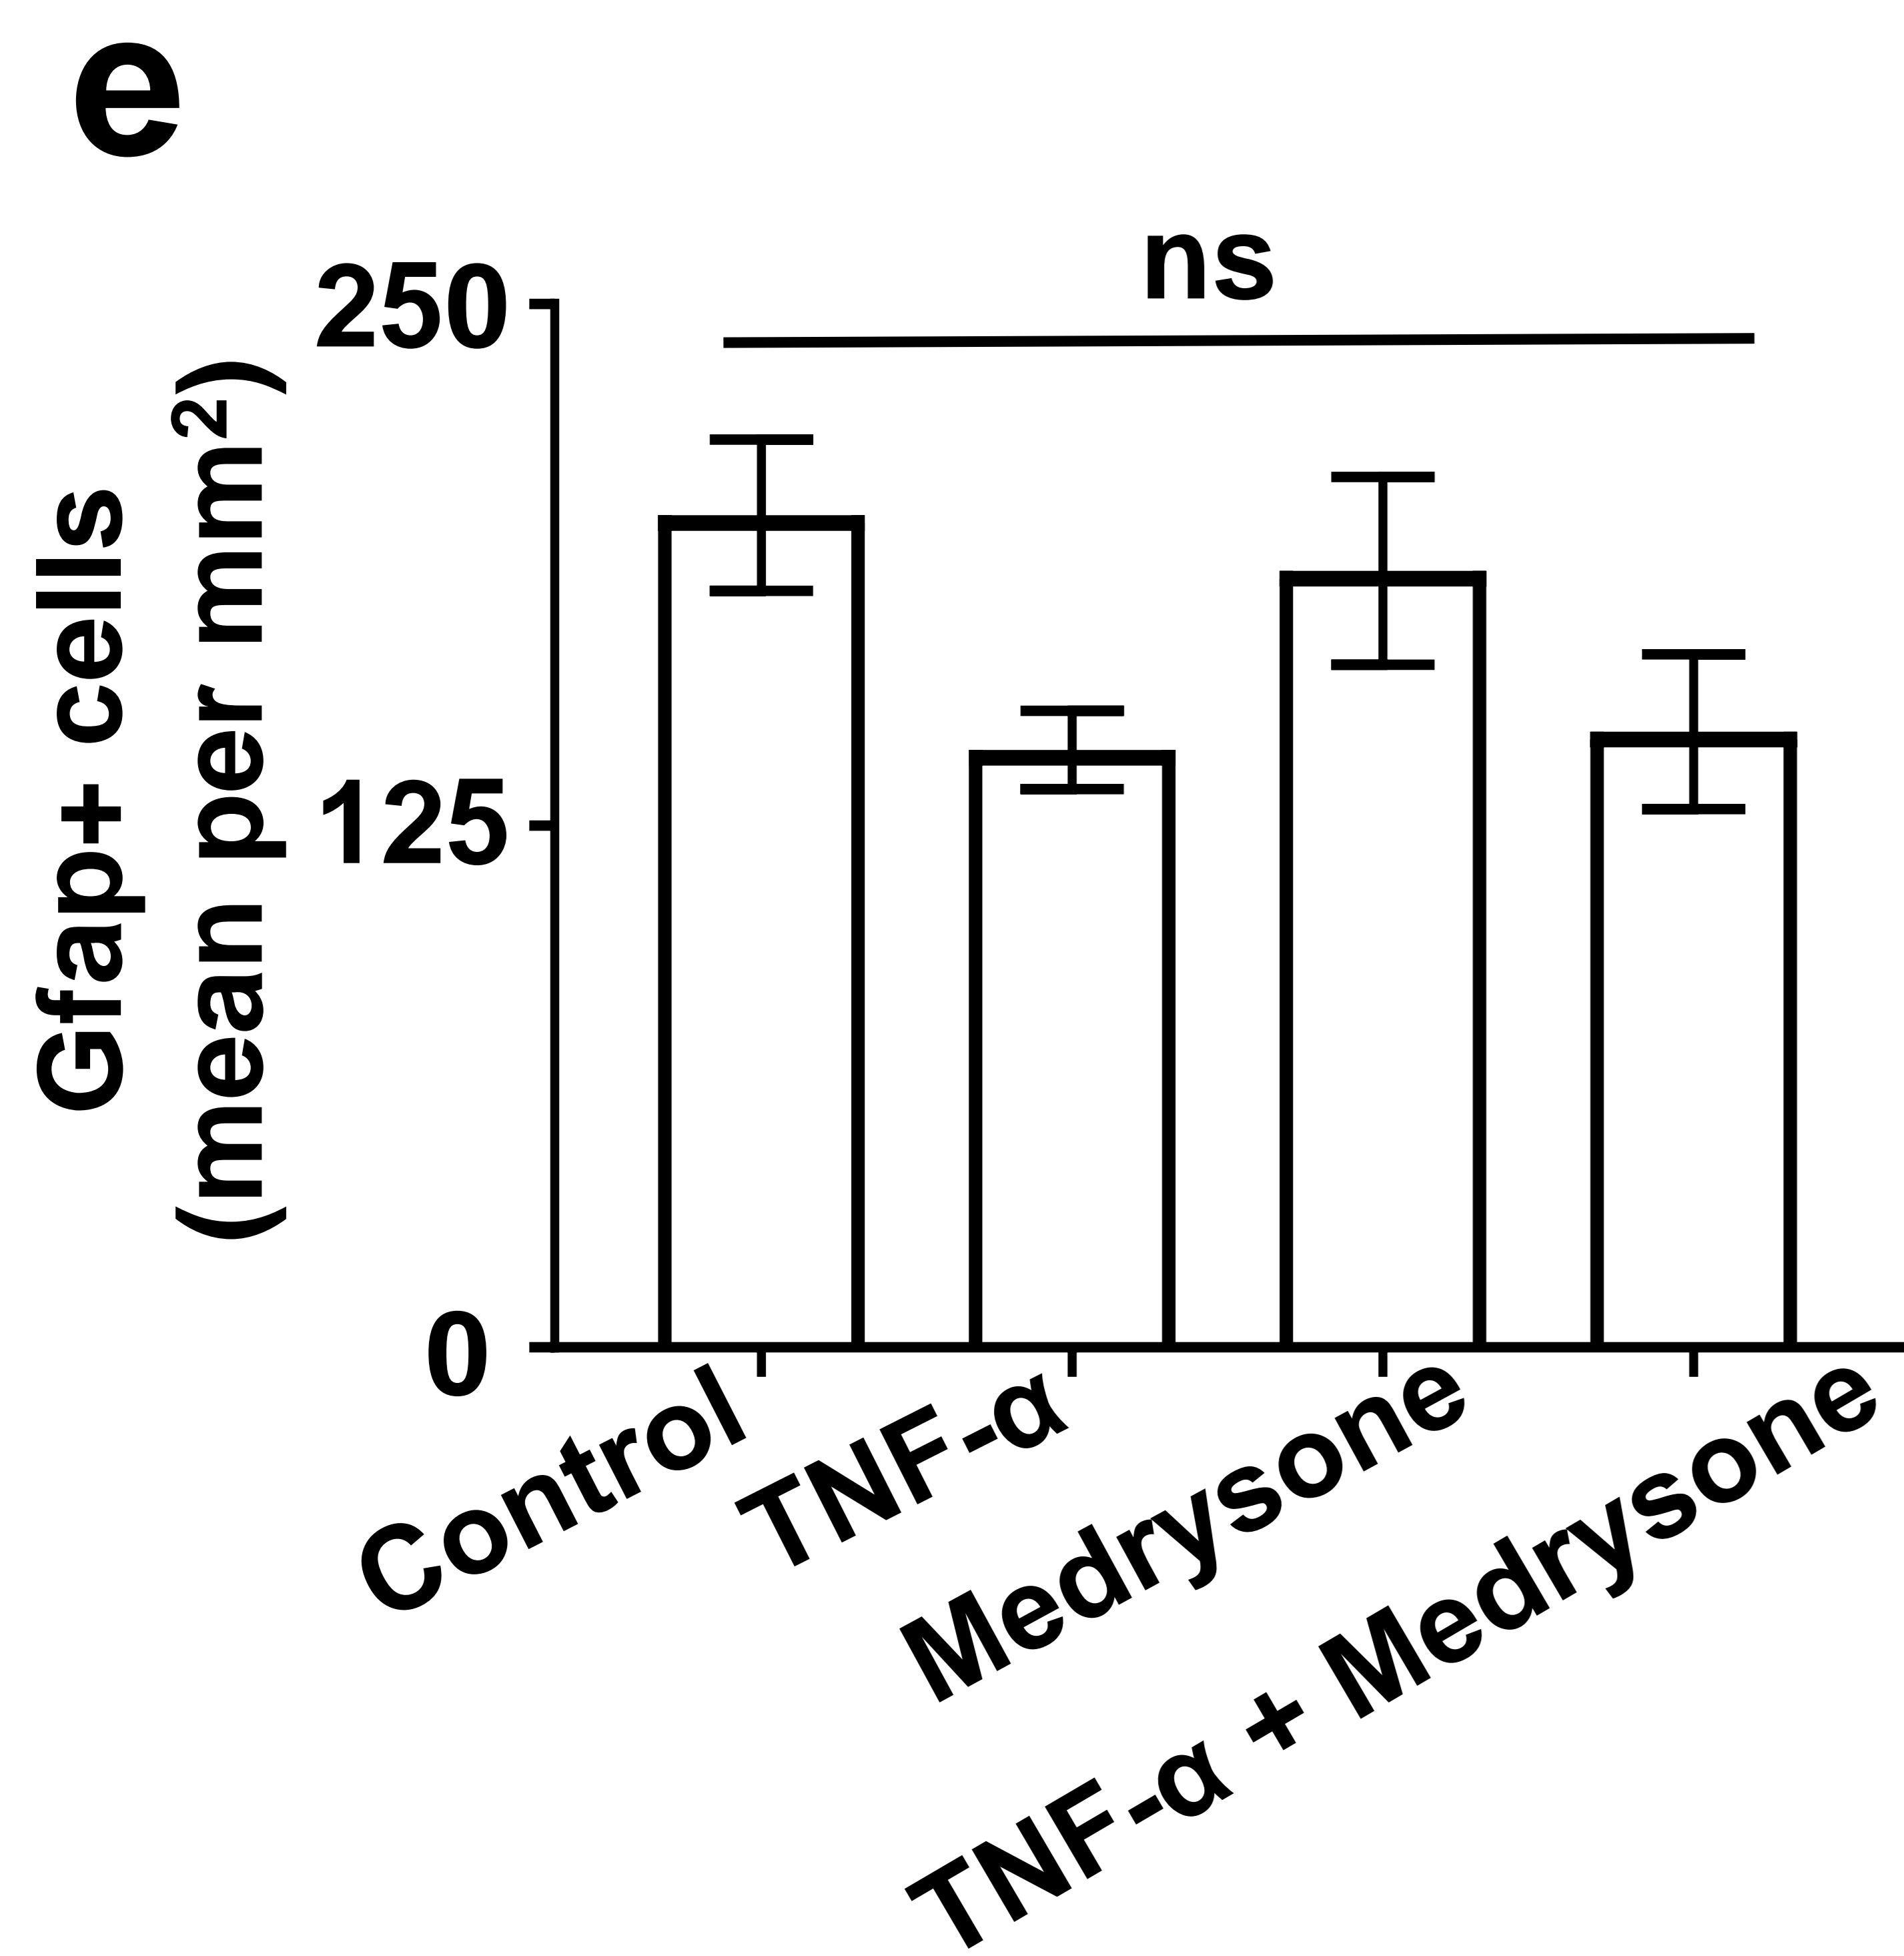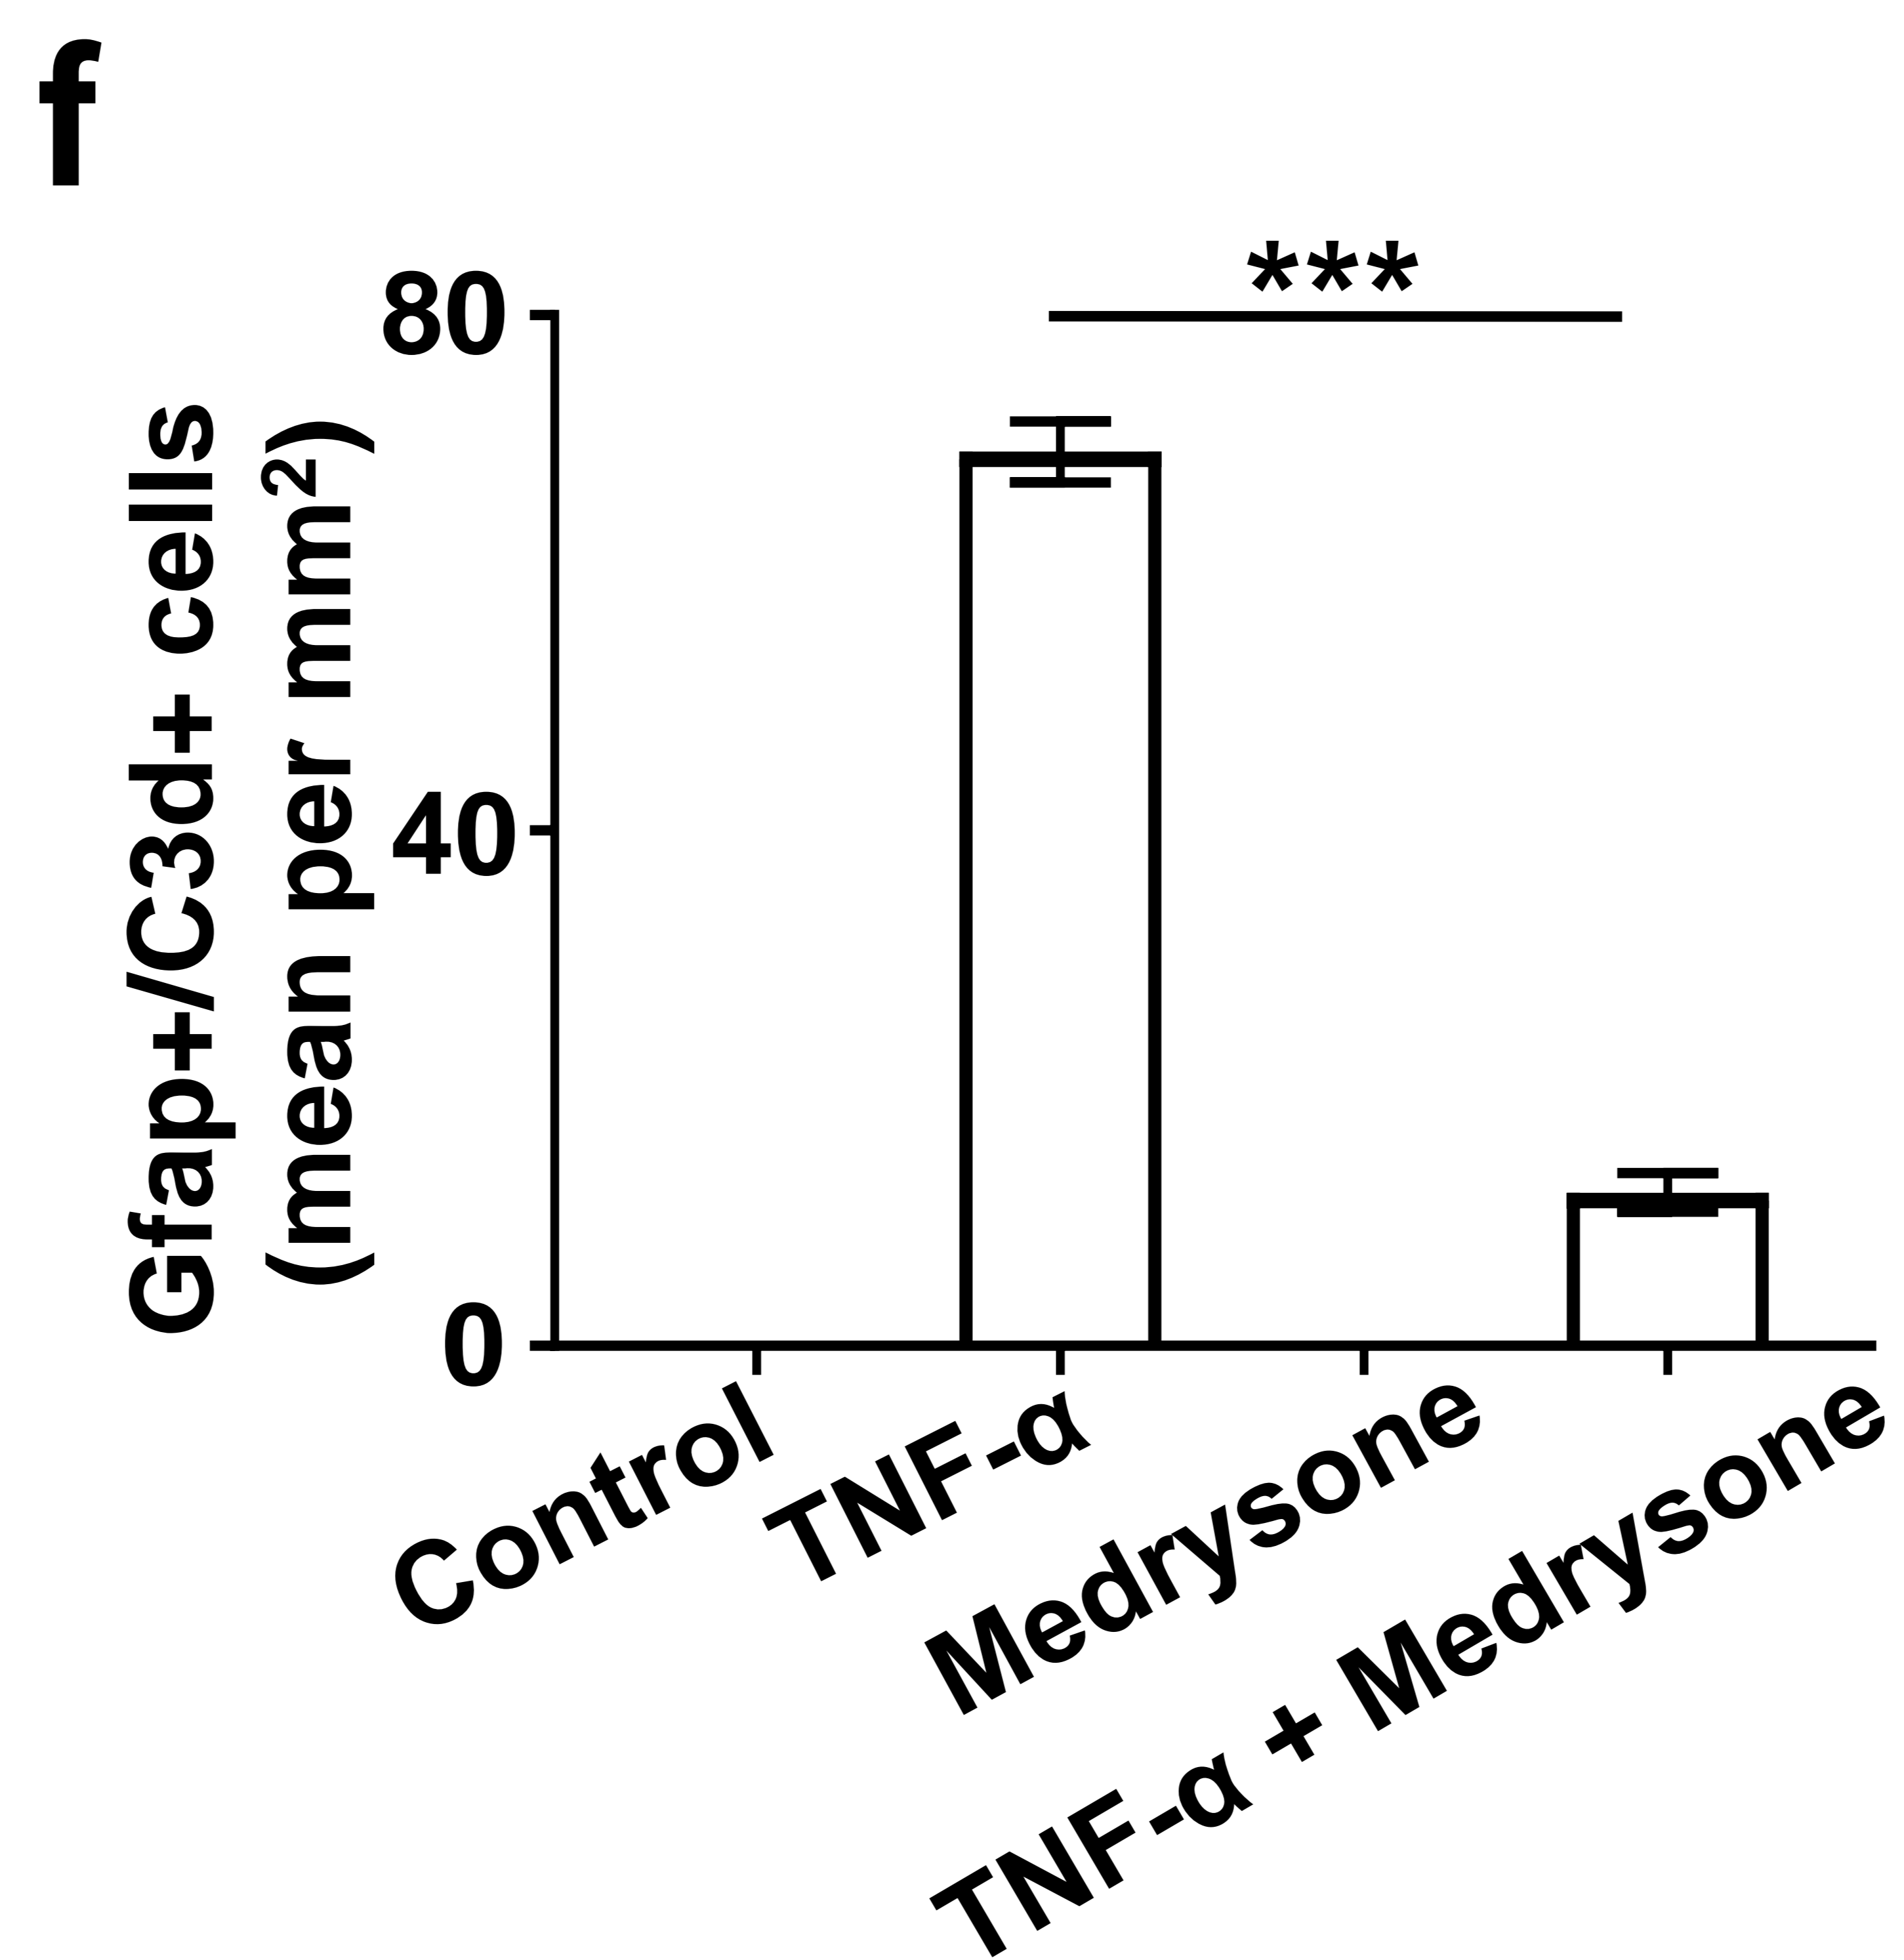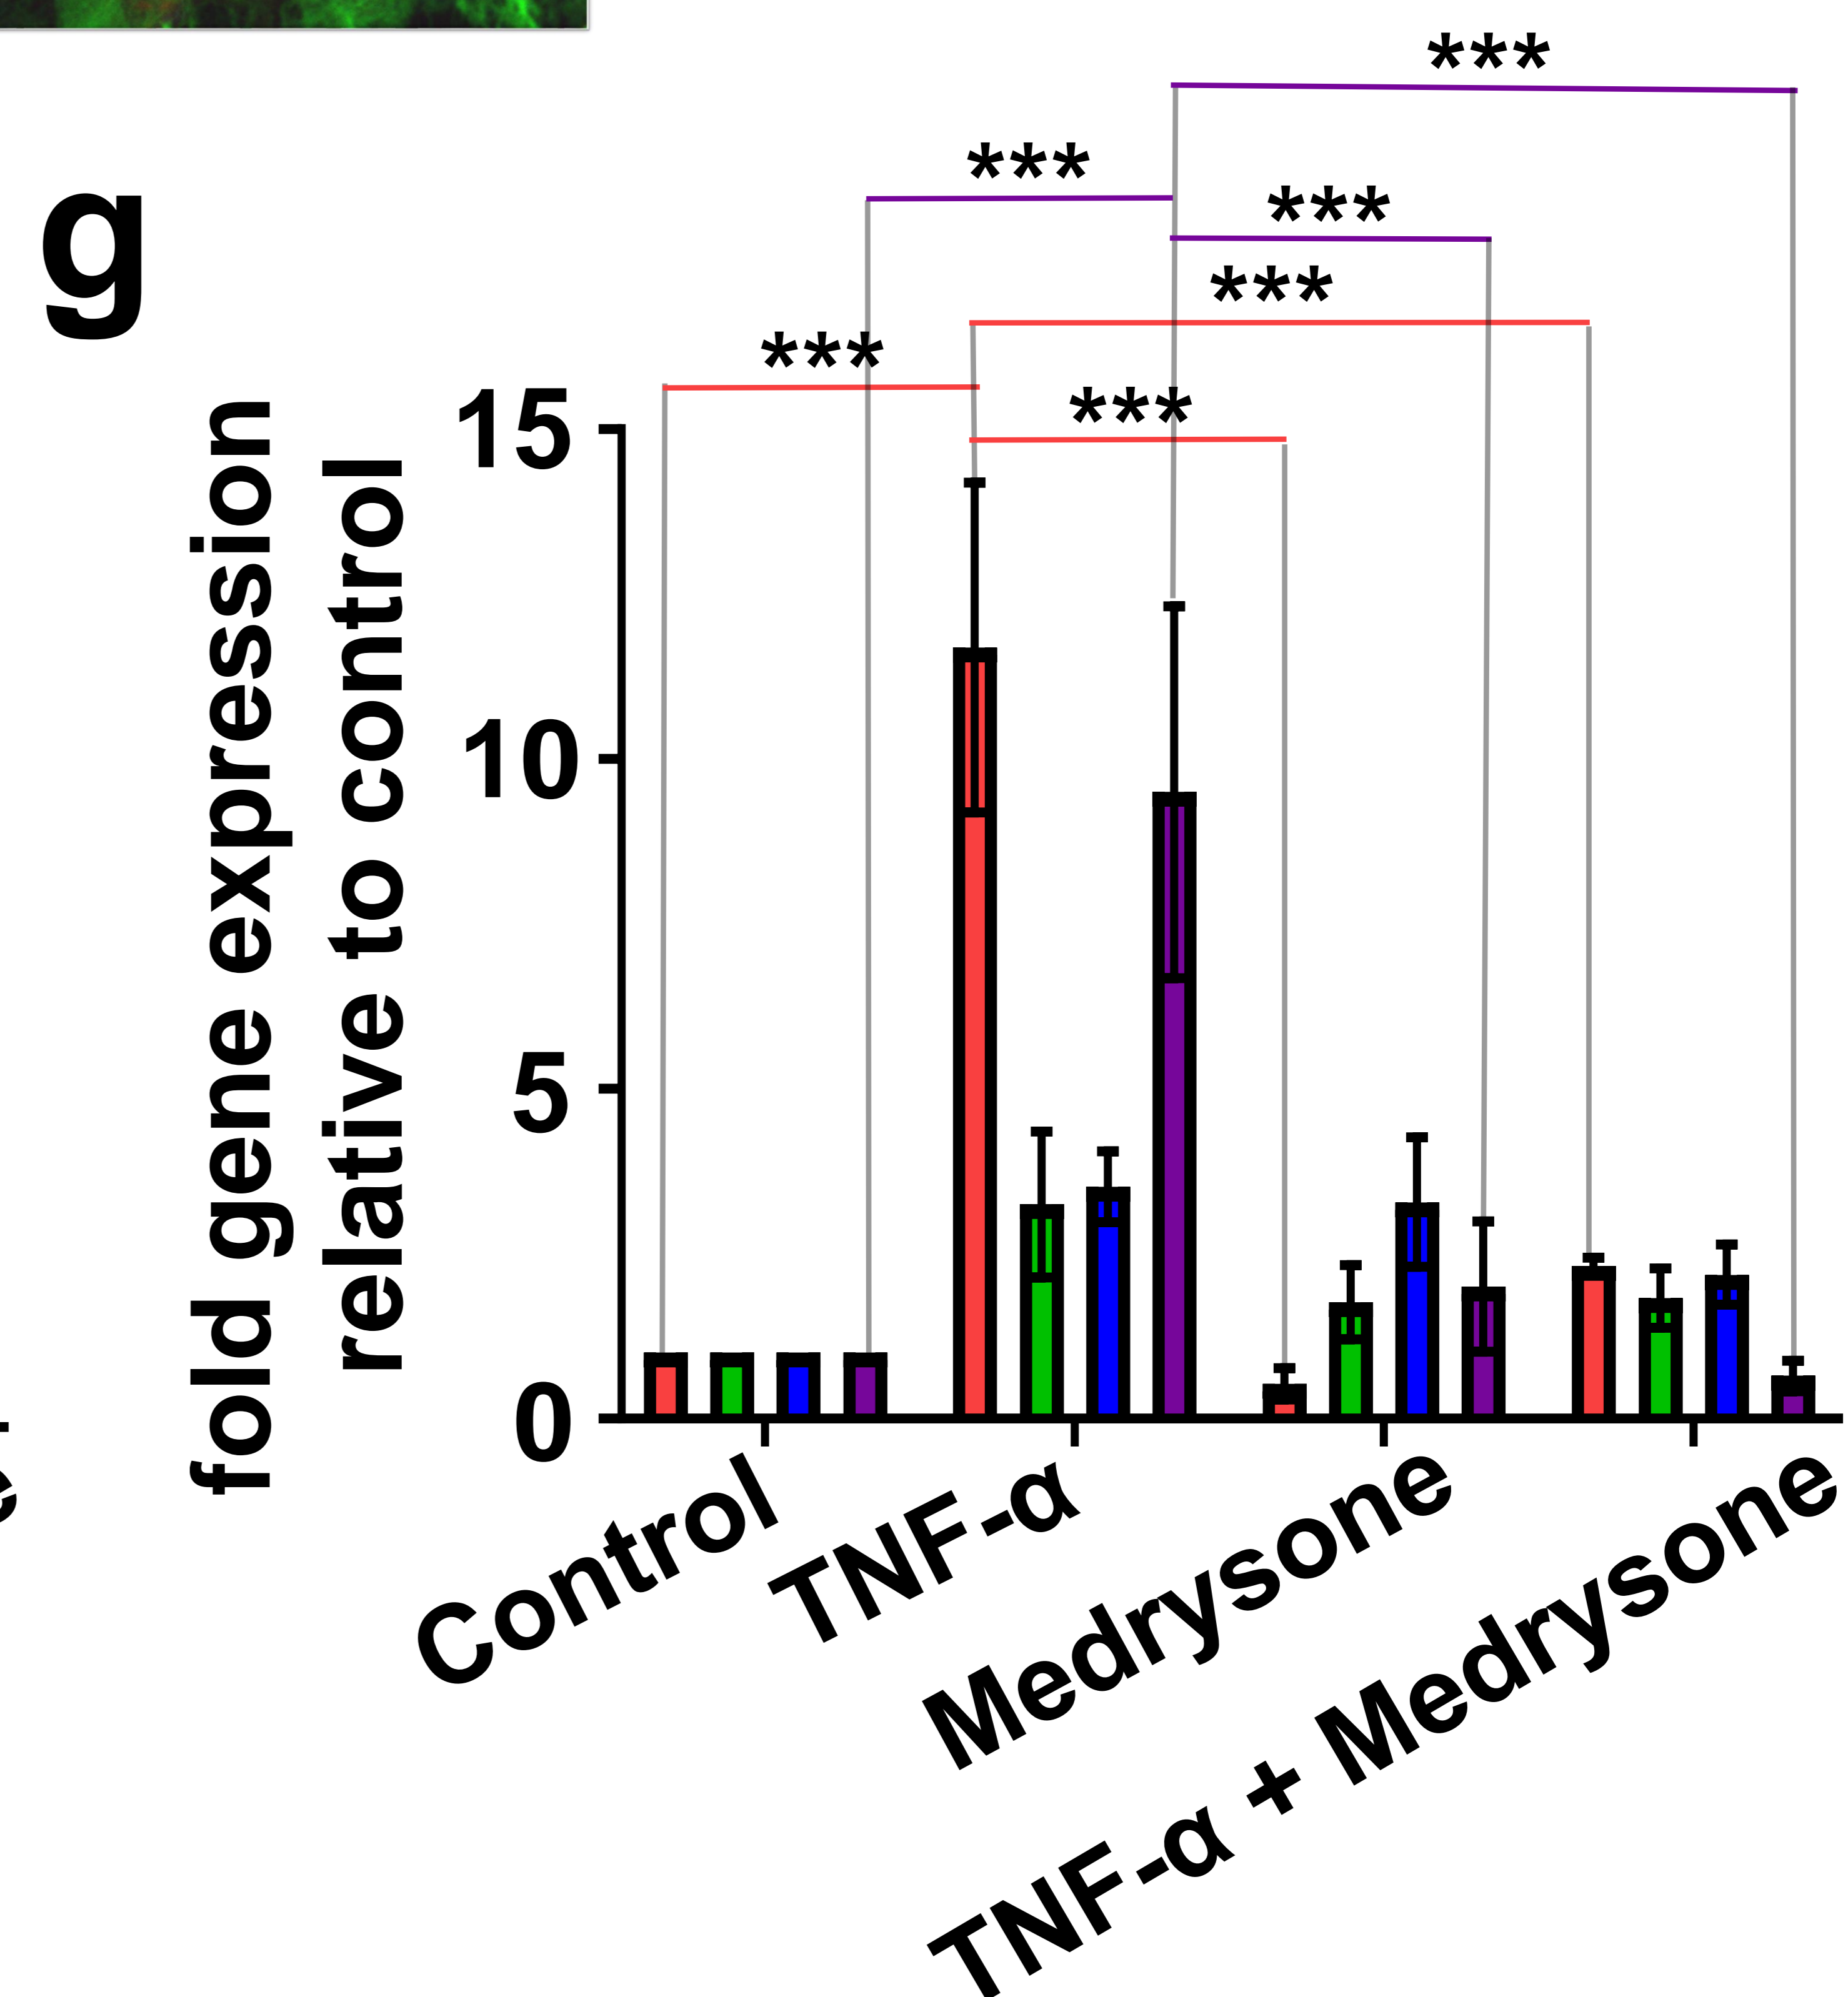

Supplement: mmc3.pdf [file mmc3.pdf]

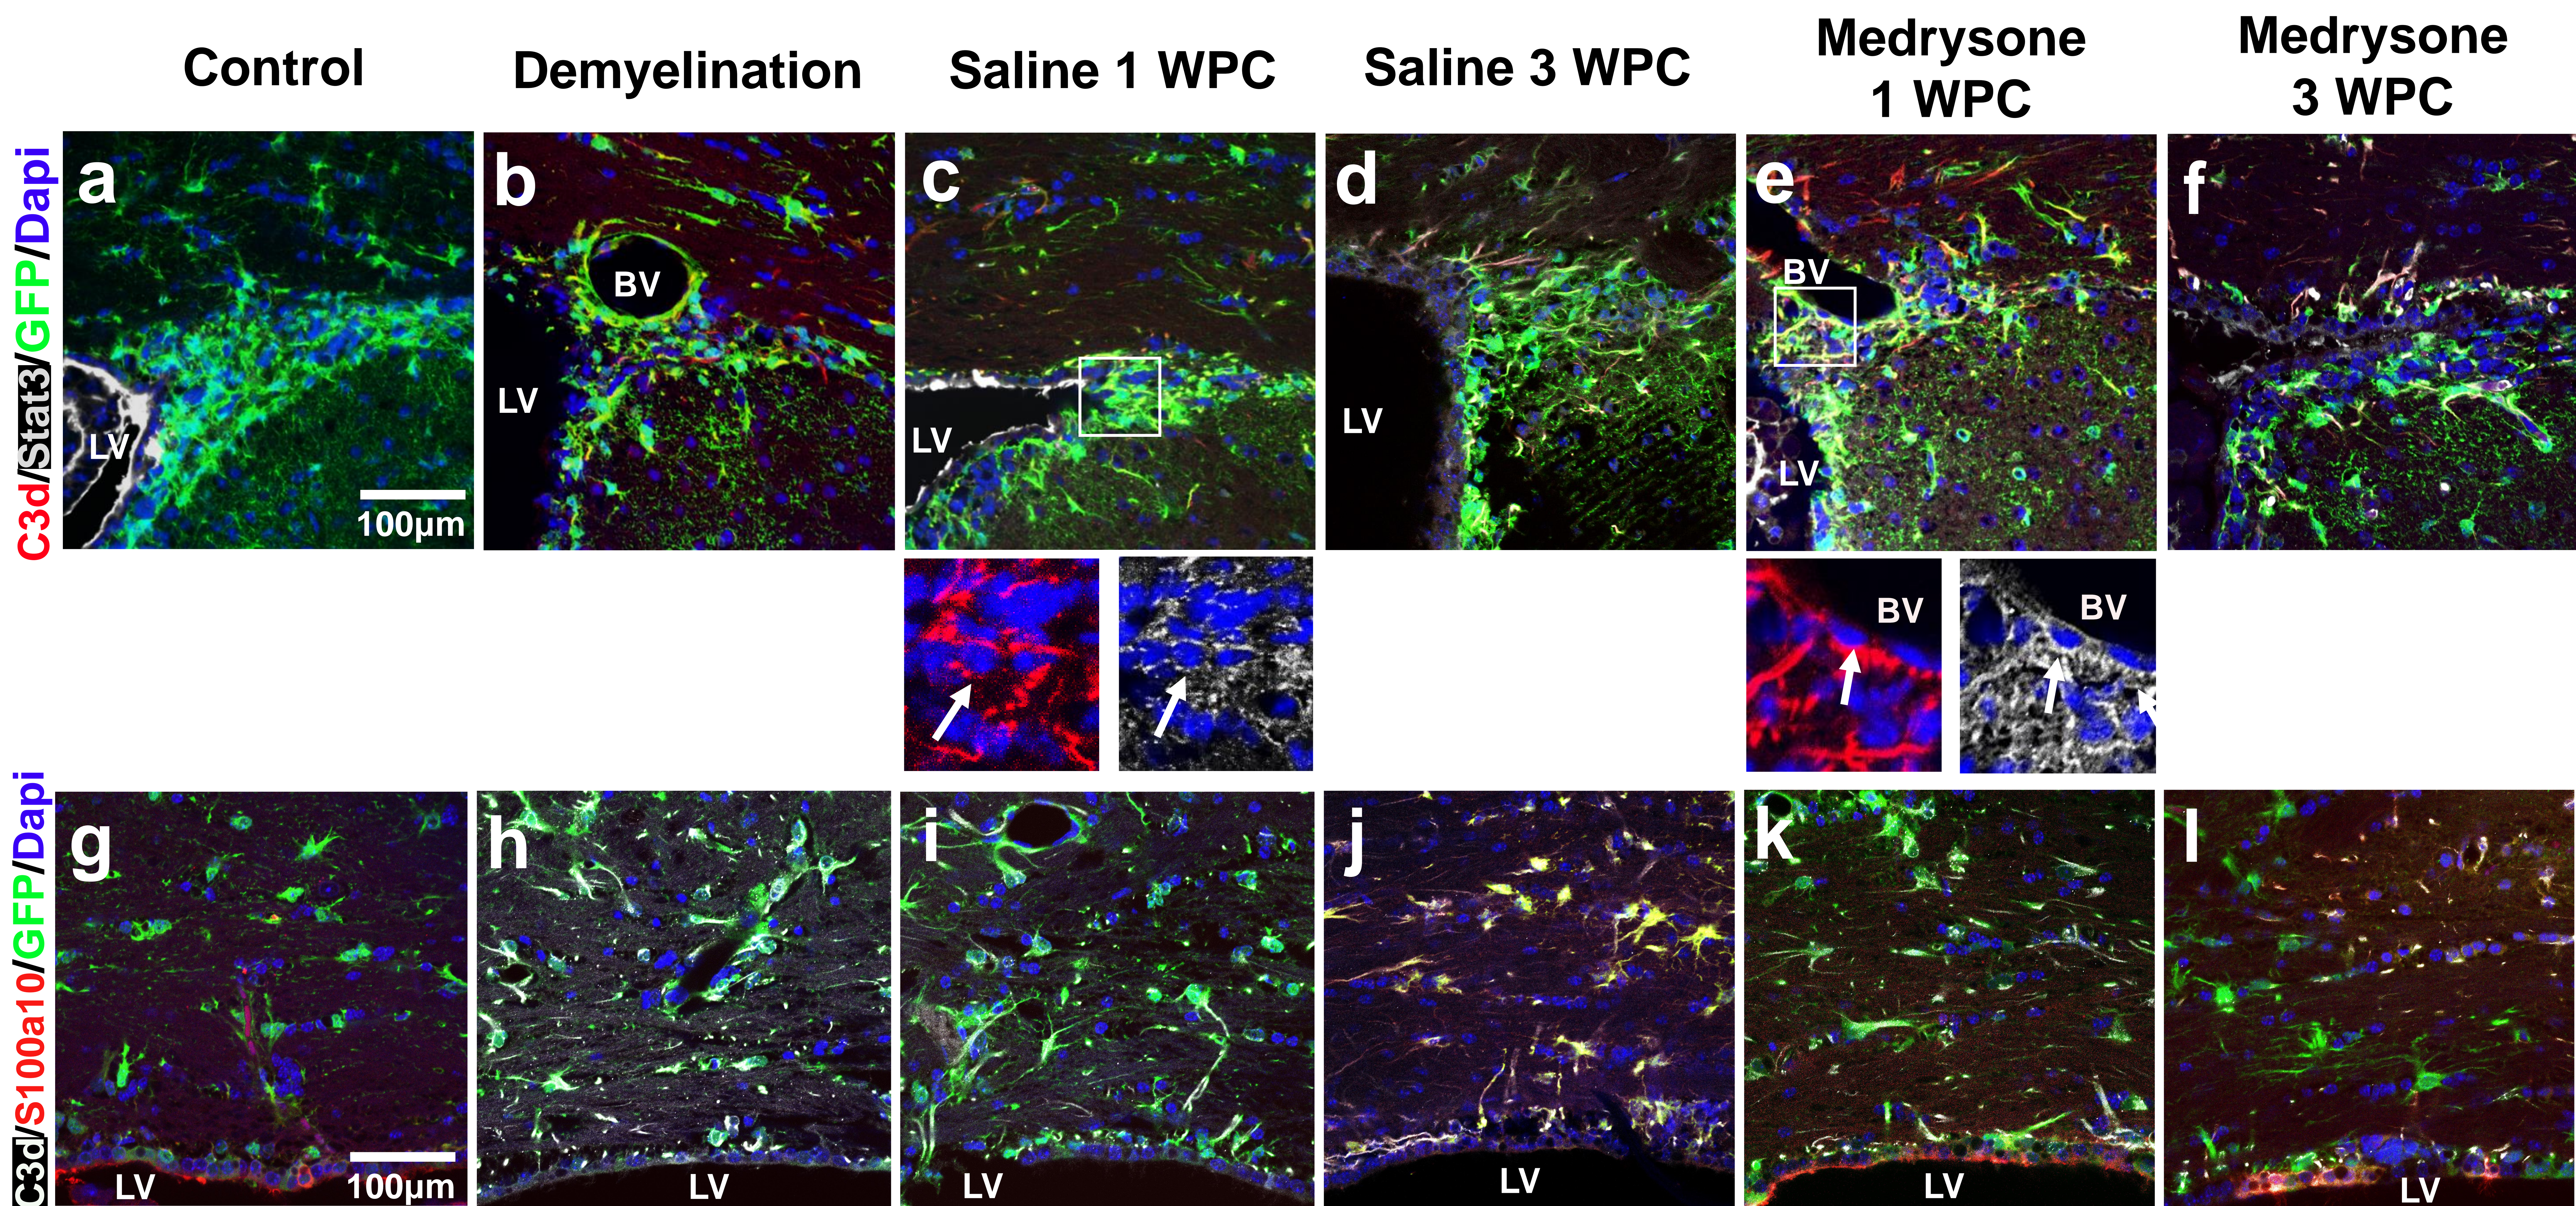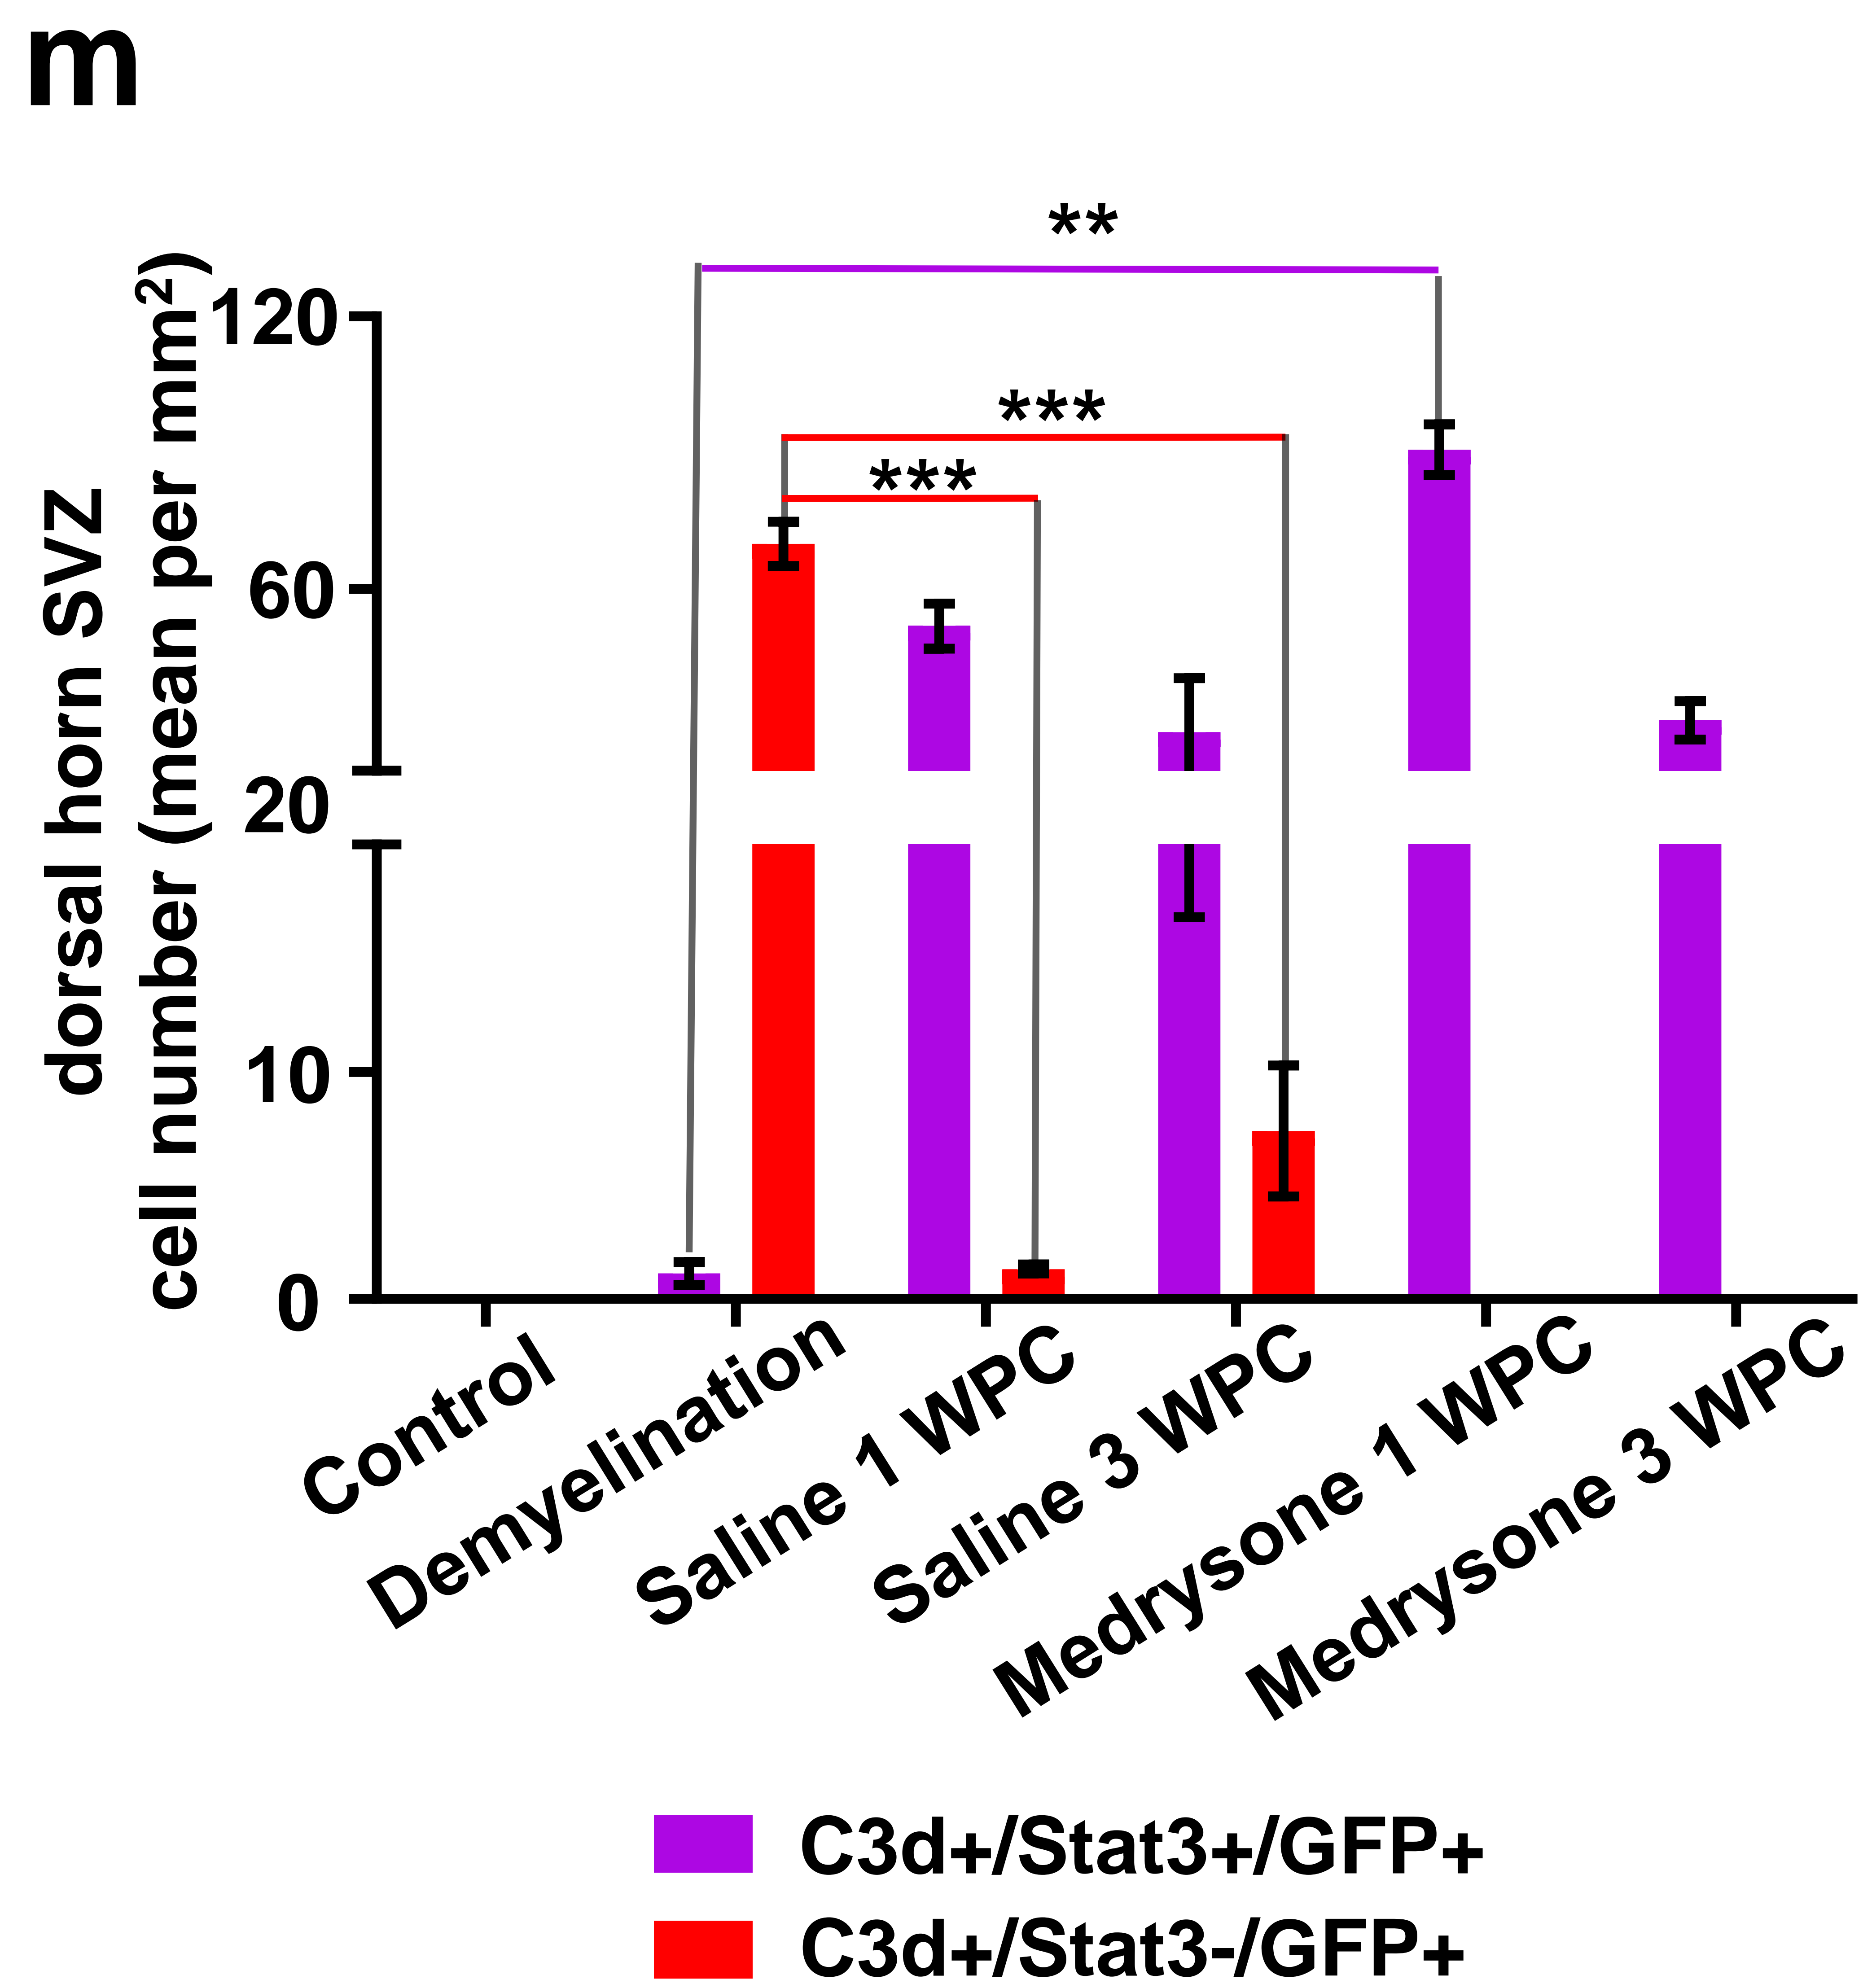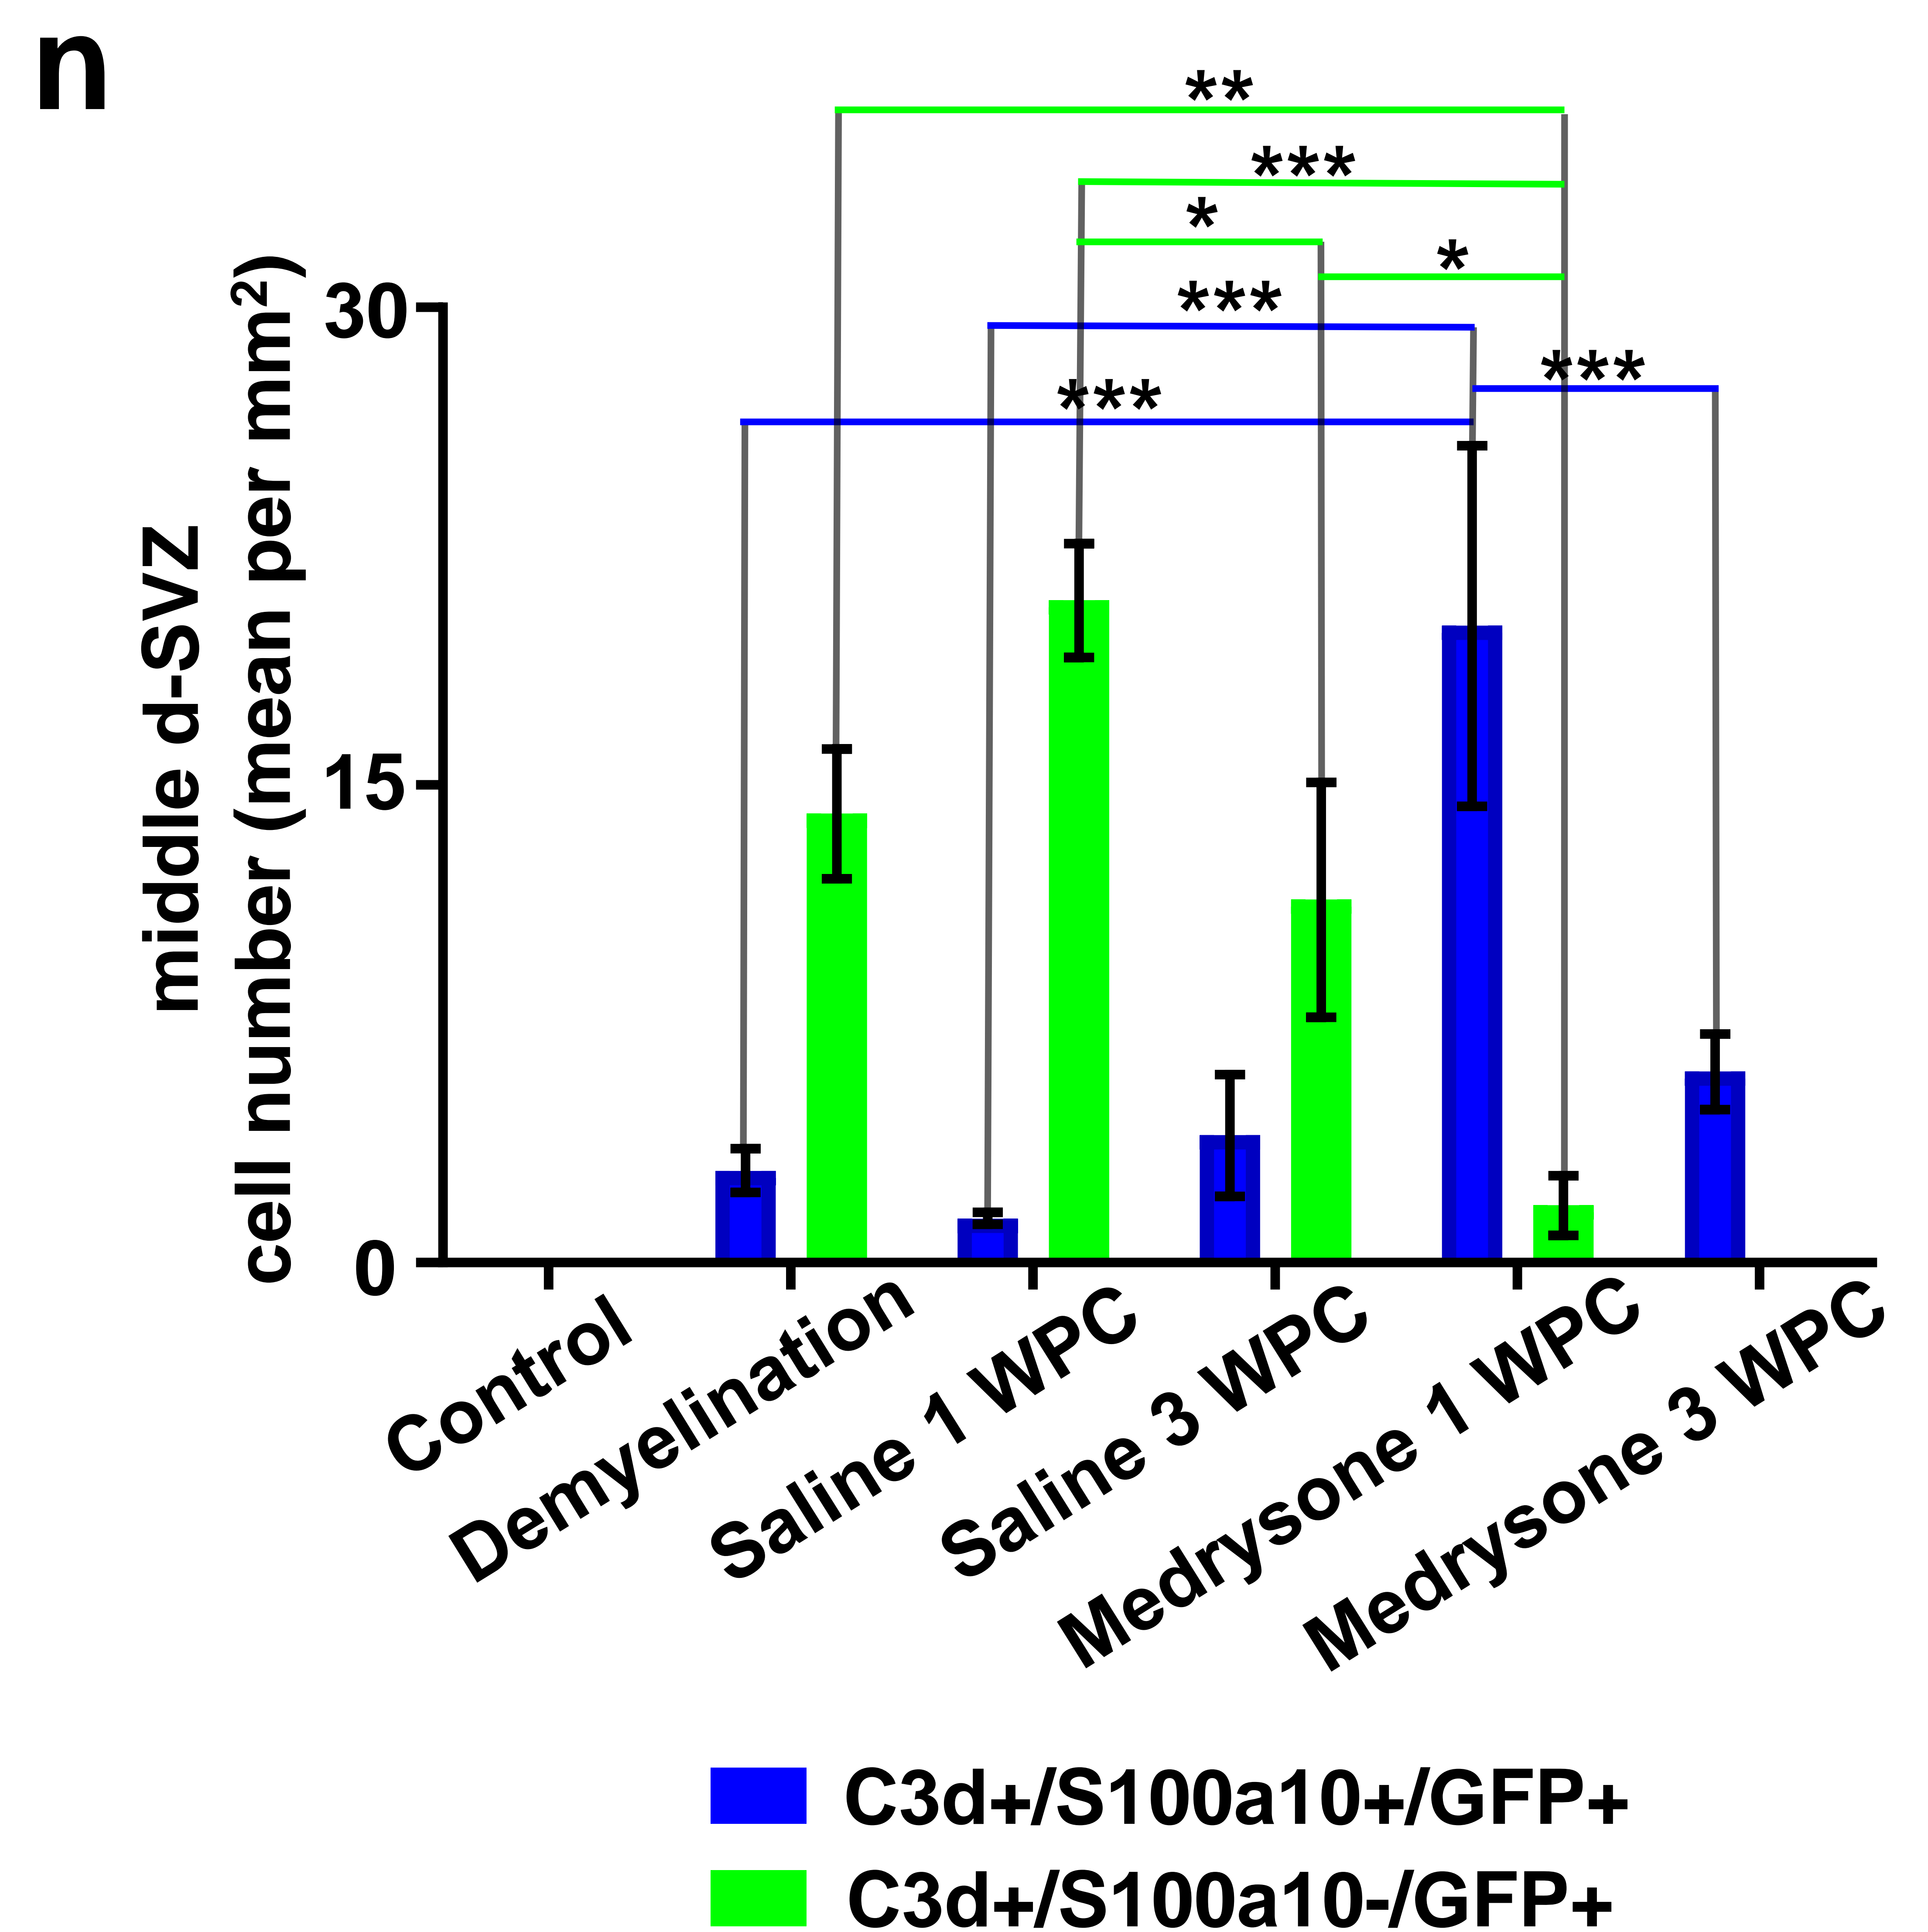

Supplement: mmc4.pdf [file mmc4.pdf]

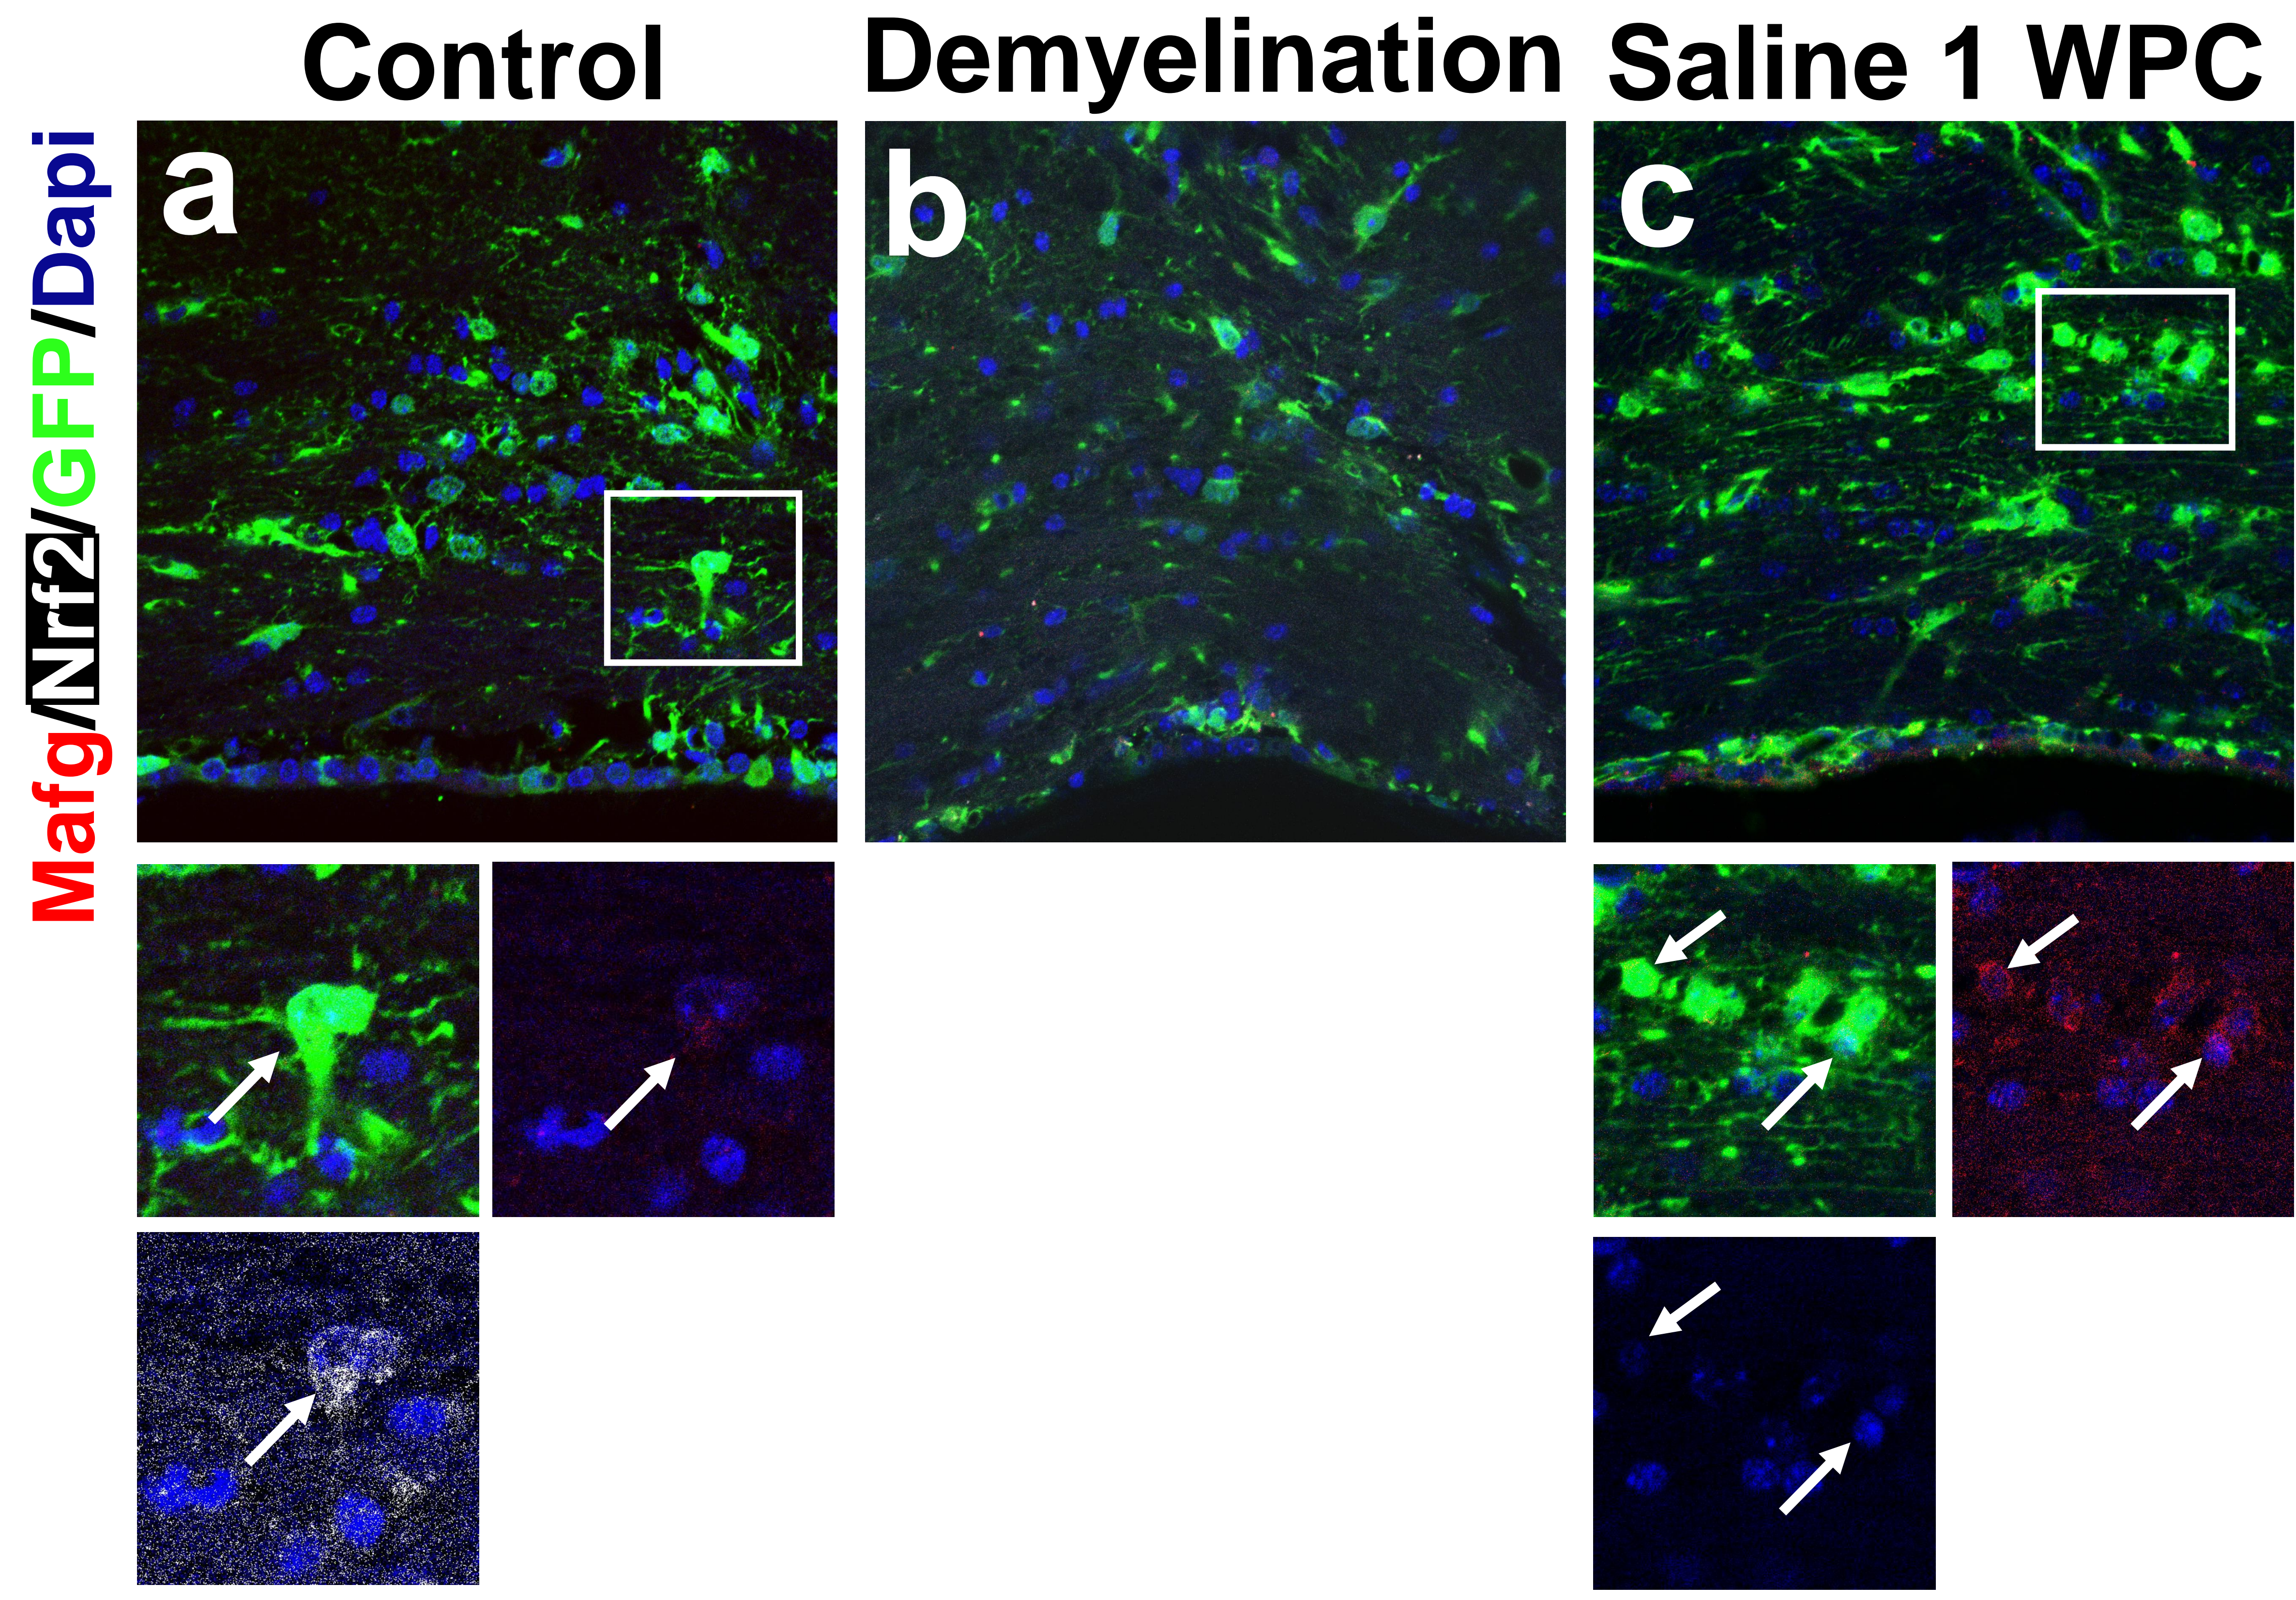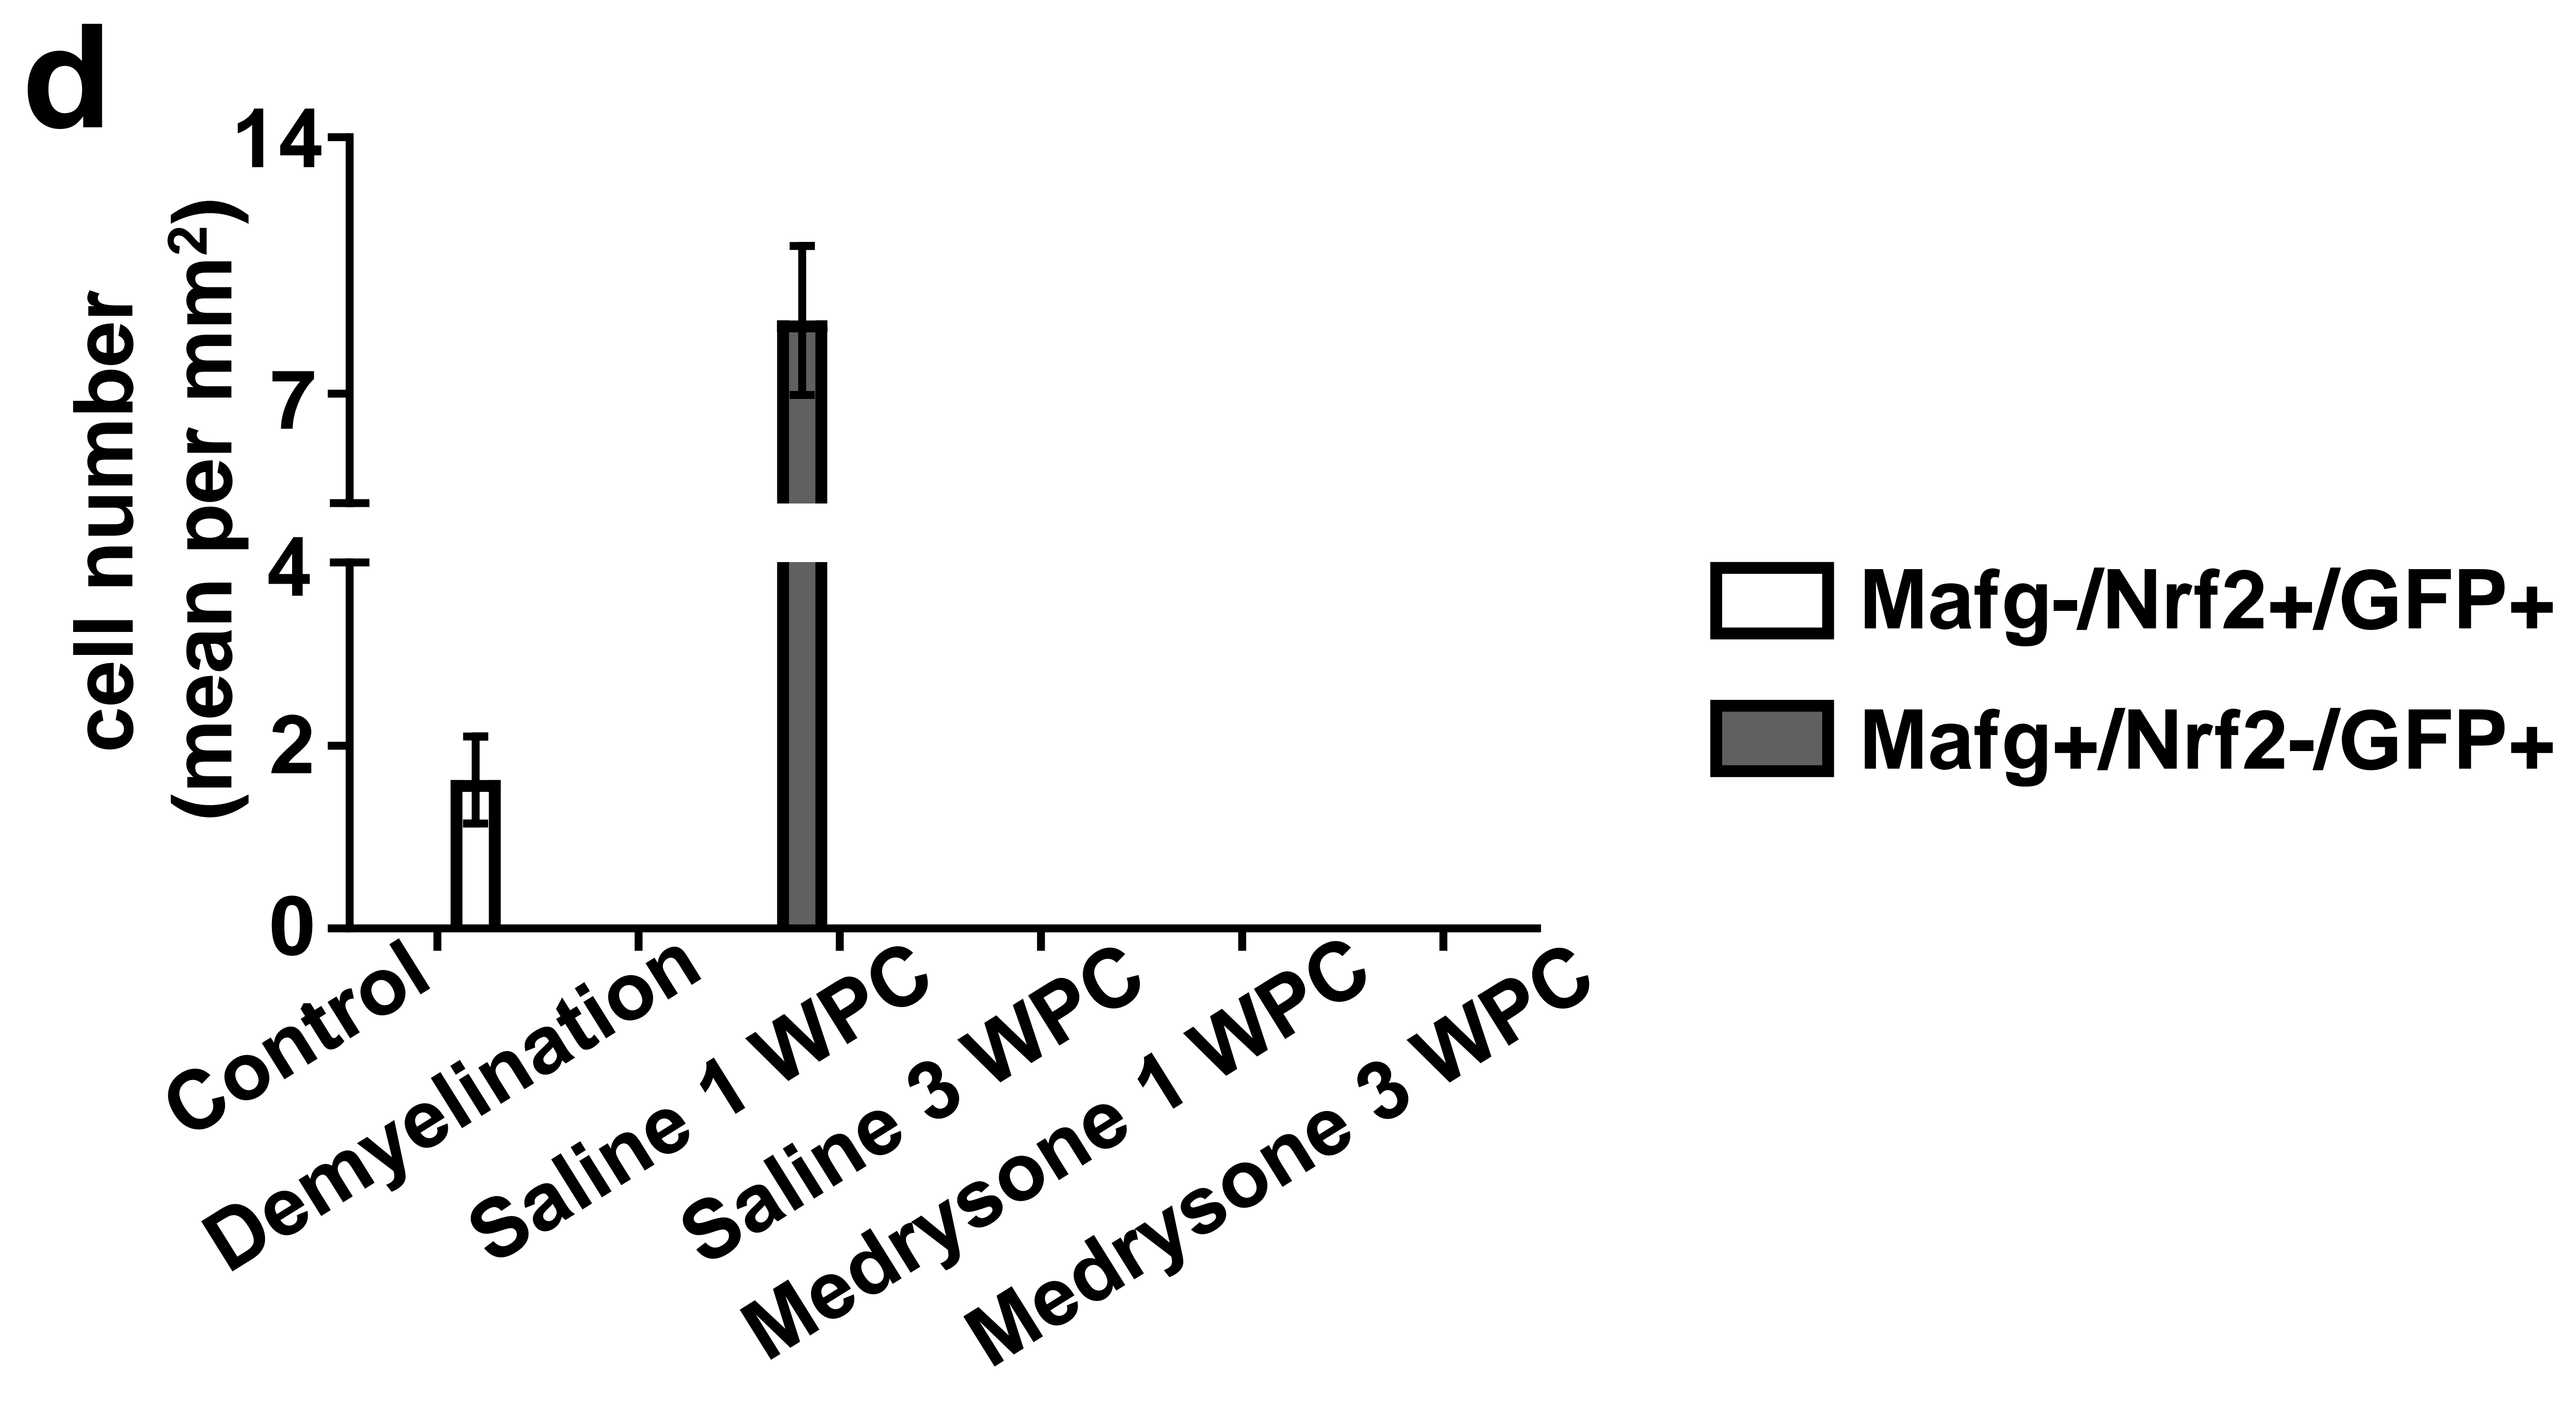

Supplement: mmc5.pdf [file mmc5.pdf]

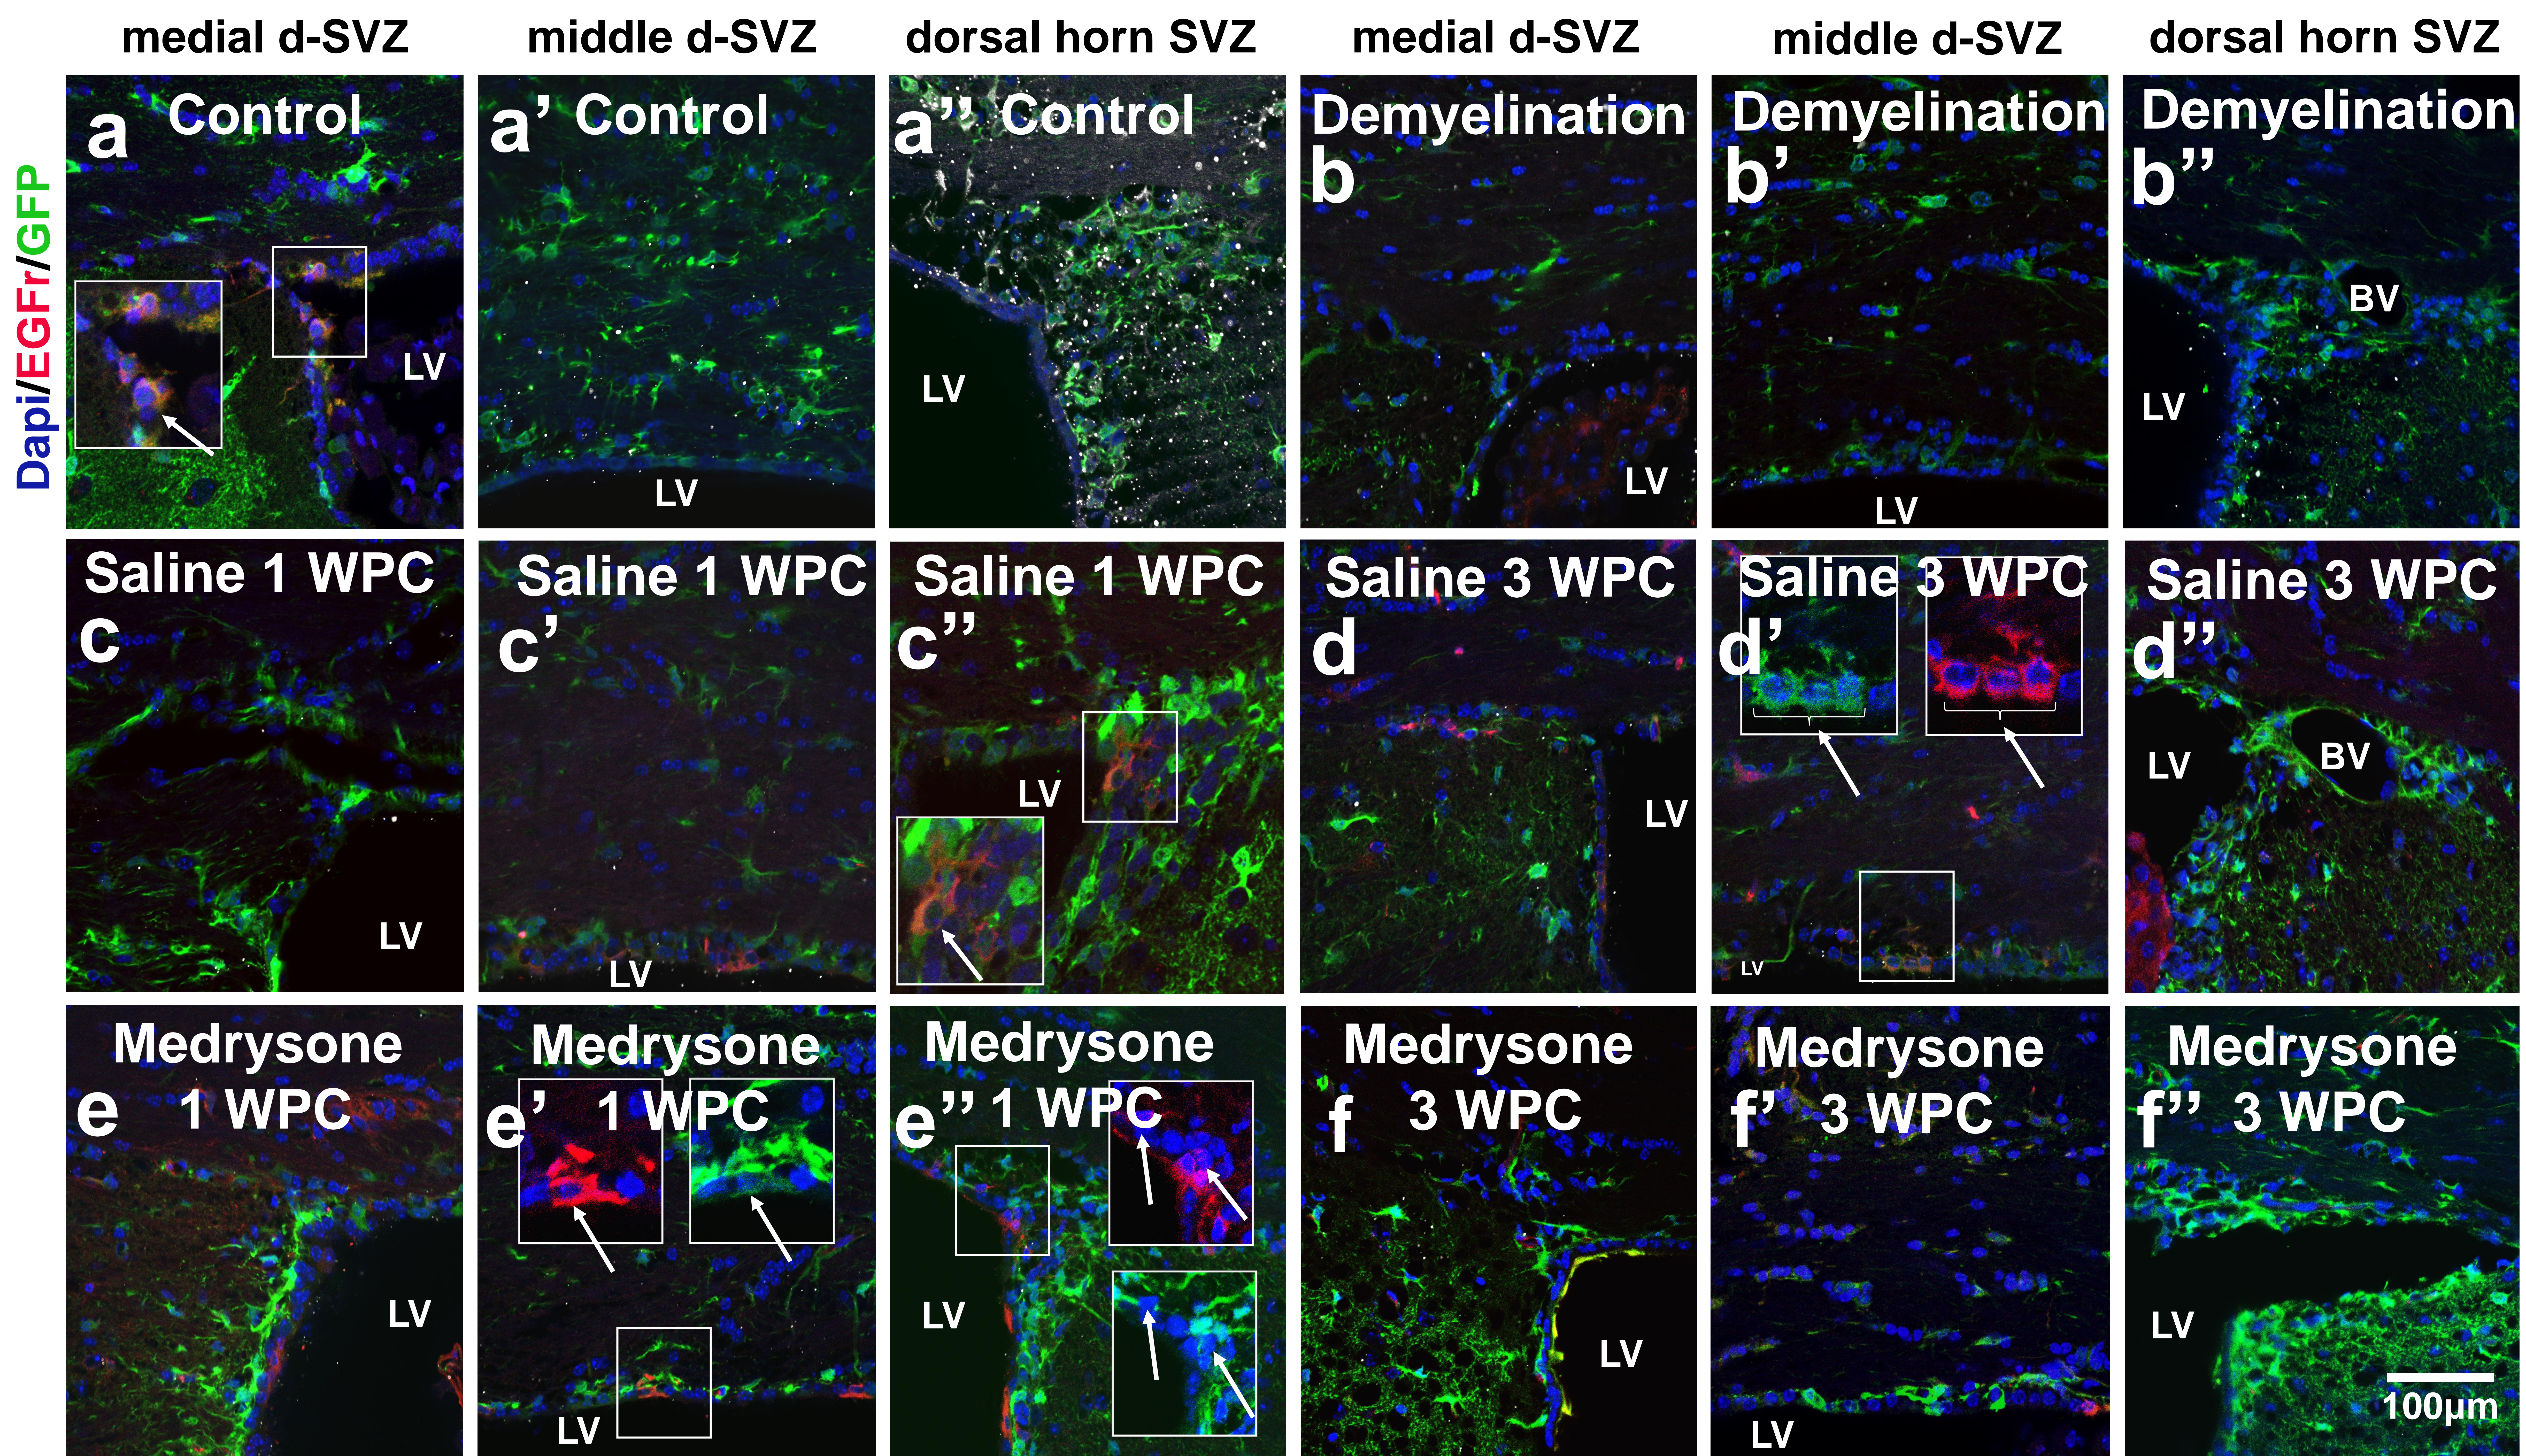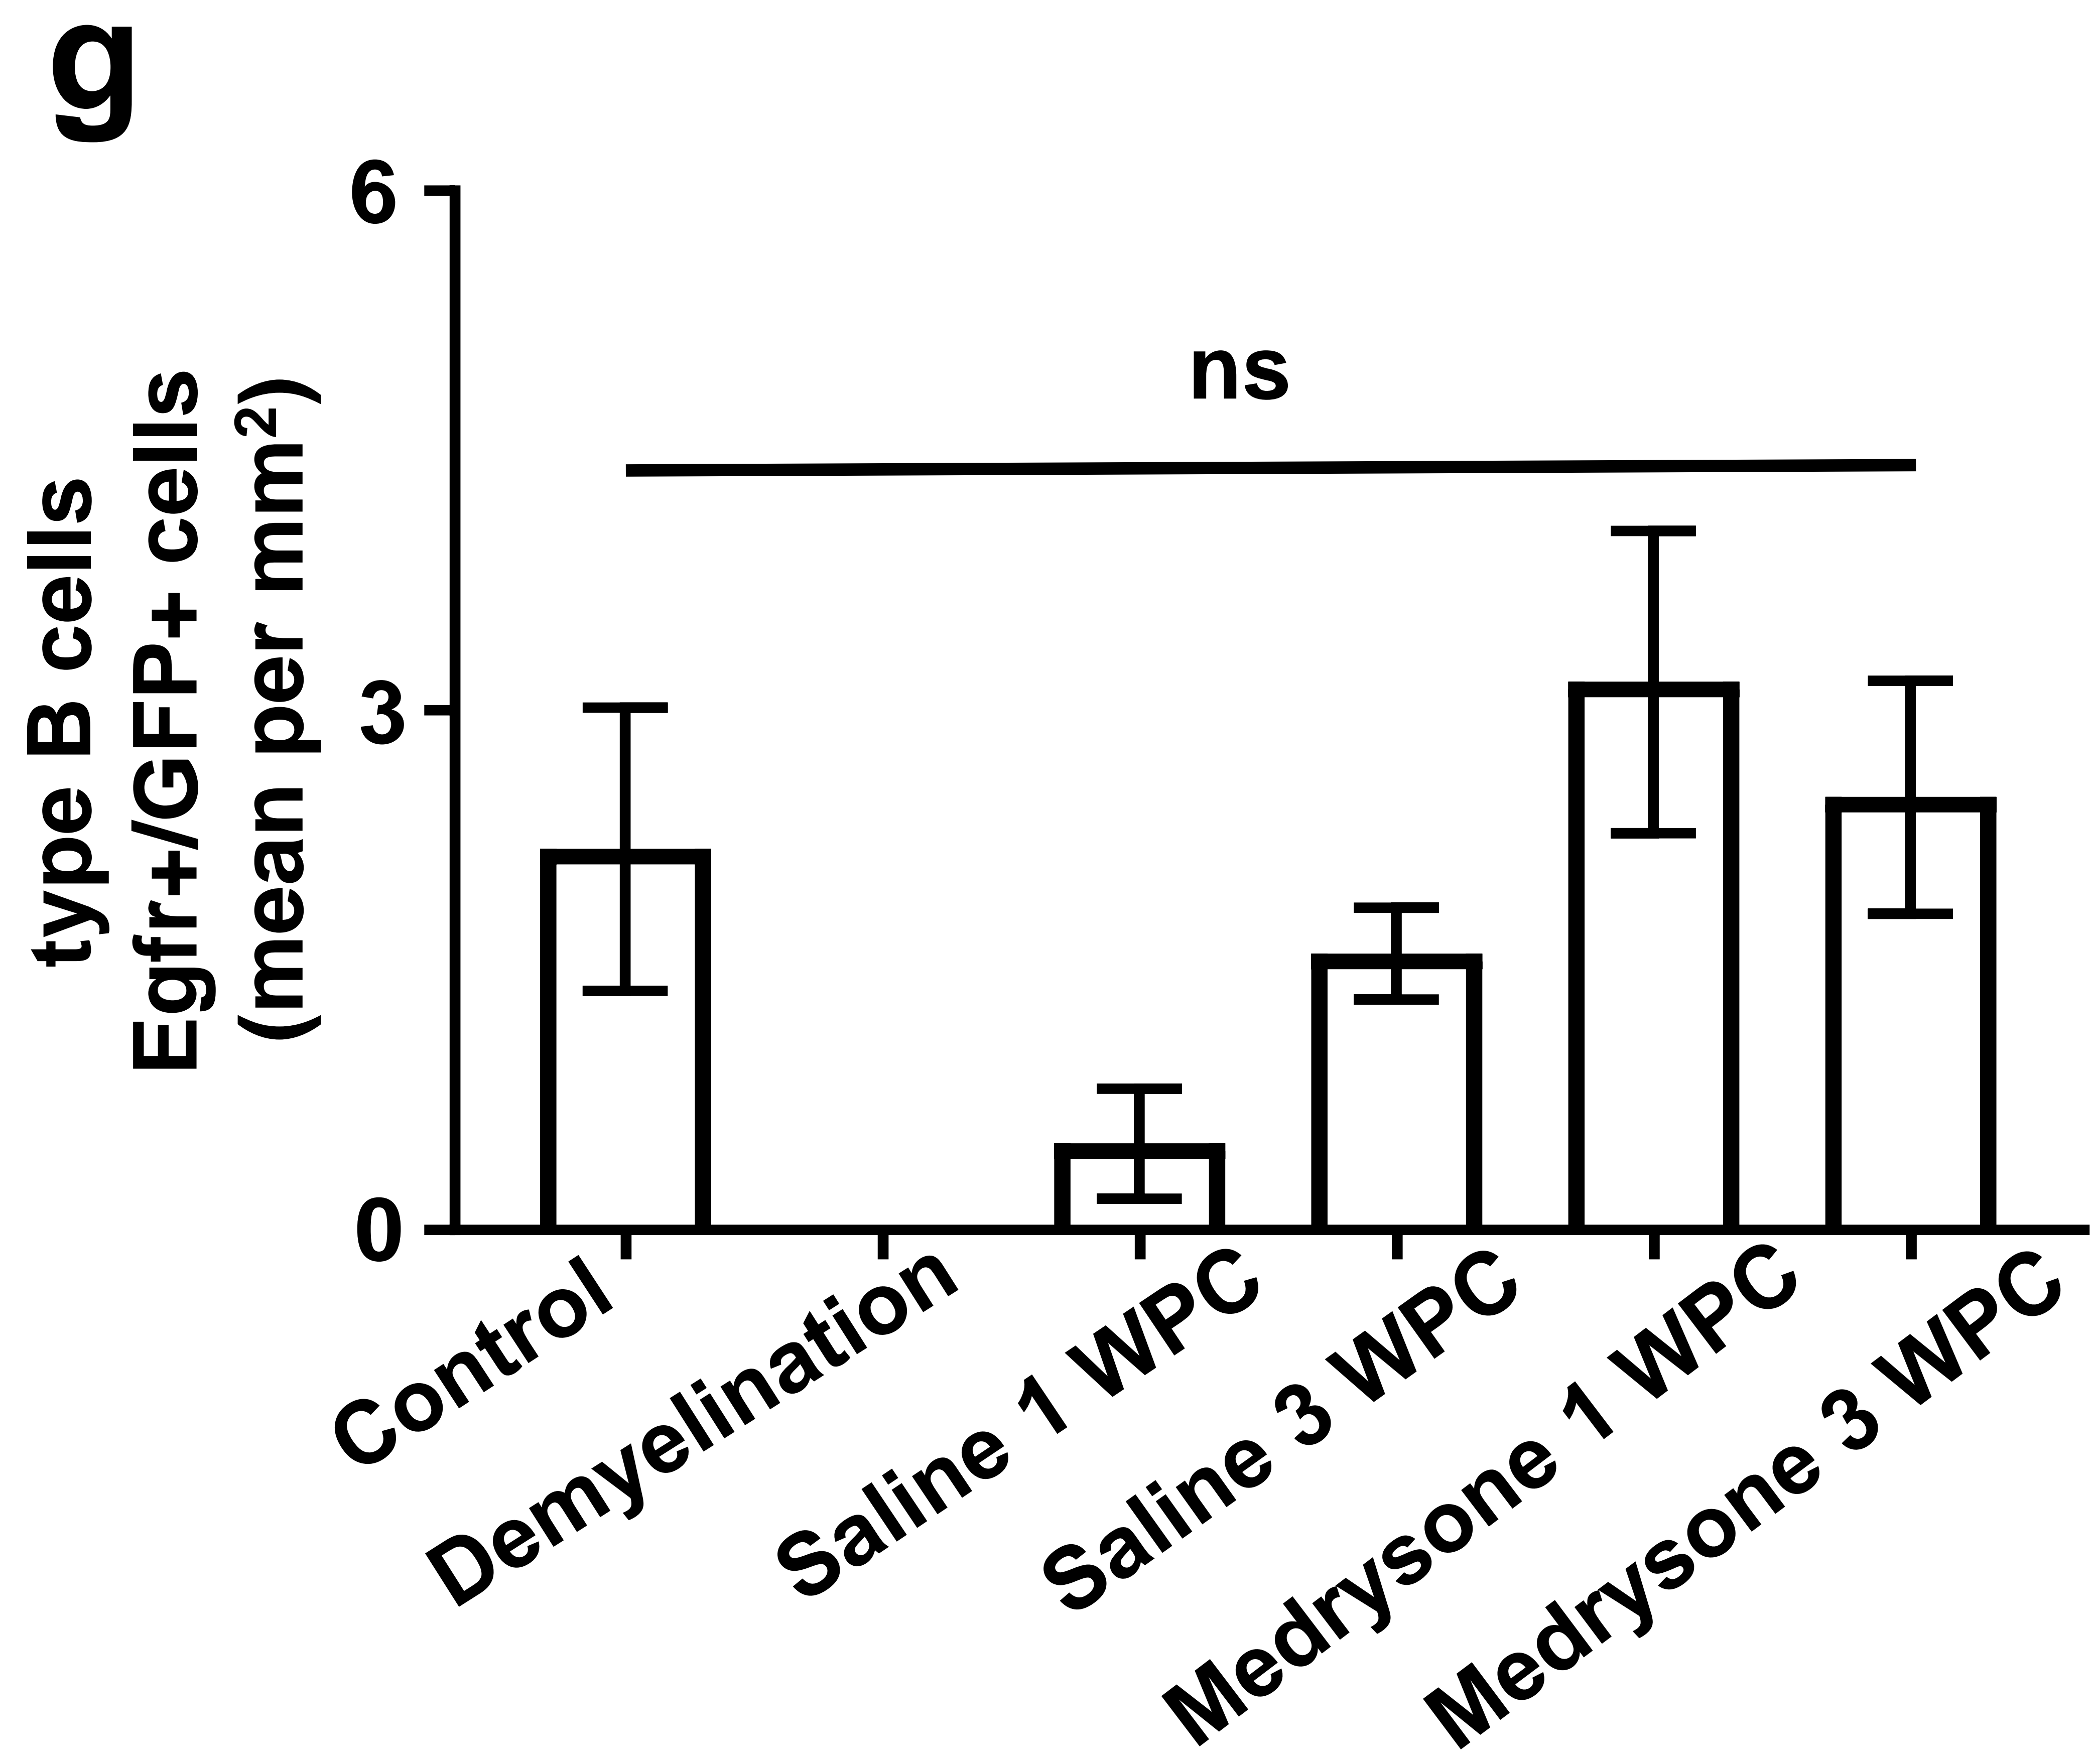

Supplement: mmc6.pdf [file mmc6.pdf]
